# Supplementary material for: Scaling of an antibody validation procedure enables quantification of antibody performance in major research applications
Source: eLife. 2023 Nov 23;12:RP91645. doi: 10.7554/eLife.91645 (PMC10666931; doi:10.7554/eLife.91645)
Supplement: Figure 1—source data 1. — List of all nominated proteins for which an antibody characterization report was generated. The list includes the corresponding protein name, gene name, Uniprot ID, expected subcellular distribution, number of articles referring to the protein itself, the total number of antibodies tested, the number of renewable antibodies tested, the number of companies that have provided antibodies, the cell line background used to generate a KO line, the RNA level – units are log2(TPM +1) and the DOI referring to the antibody characterization report uploaded on ZENODO or to another publication platform. [file elife-91645-fig1-data1.xlsx]

## Sheet: Sheet1
	protein name	gene name	Uniprot ID	subcellular distribution	NIH protein database, number of articles (May 4, 2023)	# antibodies tested	# renewable antibodies tested	# of companies represented	Cell line background used in the study	RNA level (DepMap)	DOI (Zenodo)	DOI (other then Zenodo)
1	Alsin	ALS2	Q96Q42	intracellular	72	3	1	3	HAP1	3	https://doi.org/10.5281/zenodo.7671674
2	Amyloid-beta precursor protein	APP	P05067	intracellular	2972	11	8	6	HAP1	7.7	https://doi.org/10.5281/zenodo.7971926
3	Angiogenin	ANG	P03950	intracellular	222	3	1	3	HAP1	3	https://doi.org/10.5281/zenodo.7671286
4	Annexin A11	ANXA11	P50995	intracellular	117	15	3	7	HeLa	5.6	https://doi.org/10.5281/zenodo.5903684
5	Apolipoprotein E	APOE	P02649	secreted	4991	14	12	7	HAP1	3.3	https://doi.org/10.5281/zenodo.7249055
6	Ataxin-2	ATXN2	Q99700	intracellular	260	5	1	3	HAP1	4.9	https://doi.org/10.5281/zenodo.5061824
7	Ataxin-3	ATXN3	P54252	intracellular	308	8	2	5	U2OS	4.8	https://doi.org/10.5281/zenodo.5574175
8	Calpain-2 catalytic subunit	CAPN2	P17655	intracellular	194	13	4	6	MDA-MB-231	8.8	https://doi.org/10.5281/zenodo.5259215
9	CD44 antigen	CD44	P16070	intracellular	1418	18	14	7	HAP1	2.7	https://doi.org/10.5281/zenodo.4730966
10	Charged multivesicular body protein 2b	CHMP2B	Q9UQN3	intracellular	124	8	5	6	U2OS	4.5	https://doi.org/10.5281/zenodo.6370501
11	Coiled-coil-helix-coiled-coil-helix domain-containing protein 10, mitochondrial	CHCHD10	Q8WYQ3	intracellular	59	4	3	2	HAP1	6.8	https://doi.org/10.5281/zenodo.5259992
12	Dynamin-1	DNM1	Q05193	intracellular	188	8	7	5	U2OS	5.8	https://doi.org/10.5281/zenodo.4724181
13	E3 ubiquitin-protein ligase Itchy homolog	ITCH	Q96J02	intracellular	309	8	4	9	HeLa	3.8	https://doi.org/10.5281/zenodo.6566970
14	E3 ubiquitin-protein ligase parkin	PRKN	O60260	intracellular	942	13	10	7	SH-SY5Y	1	https://doi.org/10.5281/zenodo.5747356
15	Endothelin-converting enzyme 1	ECE1	P42892	intracellular	150	6	1	6	HAP1	7.5	https://doi.org/10.5281/zenodo.7459248
16	Equilibrative nucleoside transporter 1	SLC29A1	Q99808	intracellular	193	5	3	3	HAP1	6.3	https://doi.org/10.5281/zenodo.4733134
17	Gelsolin	GSN	P06396	intracellular	339	14	9	6	U2OS	6.9	https://doi.org/10.5281/zenodo.4724188
18	Guanine nucleotide exchange C9orf72	C9ORF72	Q96LT7	intracellular	579	15	5	7	U2OS	3.8	-	https://doi.org/10.7554/eLife.48363
19	Hamartin	TSC1	Q92574	intracellular	321	8	6	5	HAP1	3.3	https://doi.org/10.5281/zenodo.6370607
20	Leucine-rich repeat serine/threonine-protein kinase 2	LRRK2	Q5S007	intracellular	1060	13	10	5	A549	5.7	https://doi.org/10.5281/zenodo.7971965
21	Macrophage colony-stimulating factor 1	CSF1	P09603	secreted	274	14	8	7	U87-MG	5.8	https://doi.org/10.5281/zenodo.6941512
22	Matrin-3	MATR3	P43243	intracellular	323	9	4	7	HAP1	8	https://doi.org/10.5281/zenodo.5644346
23	Midkine	MDK	P21741	secreted	213	8	5	5	HAP1	8.7	https://doi.org/10.5281/zenodo.5644321
24	Mitogen-activated protein kinase 1	MAPK1	P28482	intracellular	2252	14	7	8	HeLa	4.1	https://doi.org/10.5281/zenodo.6941499
25	Moesin	MSN	P26038	intracellular	283	10	9	4	HeLa	8.4	https://doi.org/10.5281/zenodo.4724169
26	NADH dehydrogenase [ubiquinone] iron-sulfur protein 2, mitochondrial	NDUFS2	O75306	intracellular	137	8	5	5	HAP1	7.2	https://doi.org/10.5281/zenodo.5903708
27	Neurosecretory protein VGF	VGF	O15240	secreted	47	7	1	4	U2OS	4.8	https://doi.org/10.5281/zenodo.5903141
28	Nicotinate-nucleotide pyrophosphorylase [carboxylating]	QPRT	Q15274	intracellular	37	4	3	3	HAP1	4.8	https://doi.org/10.5281/zenodo.7459387
29	Nucleolysin TIA-1 isoform p40	TIA1	P31483	intracellular	143	12	8	8	HAP1	5	https://doi.org/10.5281/zenodo.7671718
30	Optineurin	OPTN	Q96CV9	intracellular	274	7	5	4	U2OS	4.6	https://doi.org/10.5281/zenodo.4730992
31	Peroxiredoxin-1	PRDX1	Q06830	intracellular	403	12	6	6	U2OS	9.7	https://doi.org/10.5281/zenodo.4818397
32	Peroxiredoxin-6	PRDX6	P30041	intracellular	251	12	6	5	HAP1/HeLa	8	https://doi.org/10.5281/zenodo.4730953
33	Plasma membrane calcium-transporting ATPase 1	ATP2B1	P20020	intracellular	172	5	2	3	HAP1	3.8	https://doi.org/10.5281/zenodo.7971932
34	Plectin	PLEC	Q15149	intracellular	279	7	4	6	U2OS	7.3	https://doi.org/10.5281/zenodo.4724176
35	Pleiotrophin	PTN	P21246	secreted	175	7	2	5	U87-MG	6.2	https://doi.org/10.5281/zenodo.7459312
36	Pro-cathepsin H	CTSH	P09668	intracellular	84	5	2	4	HEK293T	4.4	https://doi.org/10.5281/zenodo.5903713
37	Profilin-1	PFN1	P07737	intracellular	303	15	11	8	HAP1	9.4	https://doi.org/10.5281/zenodo.7249258
38	Prolow-density lipoprotein receptor-related protein 1	LRP1	Q07954	intracellular	500	10	9	7	HAP1	2.9	https://doi.org/10.5281/zenodo.7971951
39	Retinoic acid receptor RXR-alpha	RXRA	P19793	intracellular	508	10	8	7	HCT116	2.9	https://doi.org/10.5281/zenodo.6566983
40	Rho GDP-dissociation inhibitor 1	ARHGDIA	P52565	intracellular	199	14	11	7	HEK-293T	7.6	https://doi.org/10.5281/zenodo.7249083
41	RNA-binding protein FUS	FUS	P35637	intracellular	663	10	8	5	HeLa	8.8	https://doi.org/10.5281/zenodo.5259944
42	Secreted frizzled-related protein 1	SFRP1	Q8N474	secreted	234	11	5	5	A549	4.2	https://doi.org/10.5281/zenodo.6370454
43	Sequestosome-1	SQSTM1	Q13501	intracellular	955	17	14	5	U2OS	6.7	https://doi.org/10.5281/zenodo.4818440
44	Serine protease HTRA1	HTRA1	Q92743	secreted	334	6	1	4	HAP1	4.8	https://doi.org/10.5281/zenodo.7249120
45	Serine/threonine-protein kinase Nek1	NEK1	Q96PY6	intracellular	81	5	0	5	HeLa	2.8	https://doi.org/10.5281/zenodo.5061736
46	Serine/threonine-protein kinase TBK1	TBK1	Q9UHD2	intracellular	467	11	8	6	U2OS	4.6	https://doi.org/10.5281/zenodo.5061682
47	Sigma non-opioid intracellular receptor 1	SIGMAR1	Q99720	intracellular	170	5	3	4	HeLa	7.5	https://doi.org/10.5281/zenodo.5644356
48	Signal transducer and activator of transcription 5B	STAT5B	P51692	intracellular	319	13	7	7	HAP1	4.5	https://doi.org/10.5281/zenodo.7249185
49	SPARC-related modular calcium-binding protein 1	SMOC1	Q9H4F8	secreted	43	5	0	4	HeLa	7.1	https://doi.org/10.5281/zenodo.6566878
50	Spastin	SPAST	Q9UBP0	intracellular	227	5	4	2	HAP1	3.5	https://doi.org/10.5281/zenodo.5644358
51	Spatacsin	SPG11	Q96JI7	intracellular	105	3	2	2	HAP1	4	https://doi.org/10.5281/zenodo.7459431
52	Superoxide dismutase [Cu-Zn]	SOD1	P00441	intracellular	1272	11	8	5	HeLa	8.5	https://doi.org/10.5281/zenodo.5061103
53	Synaptotagmin-1	SYT1	P21579	intracellular	123	8	2	7	HCT116	4.6	https://doi.org/10.5281/zenodo.5644331
54	Syndecan-4	SDC4	P31431	secreted	186	10	1	6	MCF7	6.1	https://doi.org/10.5281/zenodo.6566857
55	Syntaxin-4	STX4	Q12846	intracellular	114	9	4	8	HAP1	3.9	https://doi.org/10.5281/zenodo.5903087
56	TAR DNA-binding protein 43	TARDBP	Q13148	intracellular	962	13	11	7	HAP1	7.7	https://doi.org/10.5281/zenodo.6841232
57	Transitional endoplasmic reticulum ATPase	VCP	P55072	intracellular	748	16	8	7	U2OS	7.7	https://doi.org/10.5281/zenodo.7971904
58	Transmembrane protein 106B	TMEM106B	Q9NUM4	intracellular	96	6	2	6	HAP1	4.3	https://doi.org/10.5281/zenodo.7459629
59	Tuberin	TSC2	P49815	intracellular	498	12	7	7	HAP1	3.4	https://doi.org/10.5281/zenodo.6370612
60	Tubulin alpha-4A chain	TUBA4A	P68366	intracellular	236	6	3	4	HeLa	8.5	https://doi.org/10.5281/zenodo.5903719
61	TYRO protein tyrosine kinase-binding protein	TYROBP	O43914	intracellular	99	10	6	4	THP1	8.2	https://doi.org/10.5281/zenodo.6941517
62	Tyrosine-protein kinase SYK	SYK	P43405	intracellular	565	12	12	7	THP1	6.5	https://doi.org/10.5281/zenodo.6566940
63	Ubiquilin-2	UBQLN2	Q9UHD9	intracellular	142	11	7	8	HAP1	4.9	https://doi.org/10.5281/zenodo.7459541
64	Vacuolar protein sorting-associated protein 35	VPS35	Q96QK1	intracellular	224	13	7	7	HAP1	5.3	https://doi.org/10.5281/zenodo.7671730
65	Vesicle-associated membrane protein-associated protein B/C	VAPB	O95292	intracellular	216	4	1	3	HeLa	5.2	https://doi.org/10.5281/zenodo.6370535
