# Supplementary material for: Scaling of an antibody validation procedure enables quantification of antibody performance in major research applications
Source: eLife. 2023 Nov 23;12:RP91645. doi: 10.7554/eLife.91645 (PMC10666931; doi:10.7554/eLife.91645)
Supplement: Figure 2—source data 1. — The Antibody Registry was queried with a set of Uniprot-derived protein names representing 16,262 human proteins. The number of polyclonal and monoclonal antibodies (representing recombinant and mouse monoclonal antibodies) that match the protein list is shown. [file elife-91645-fig2-data1.xlsx]

## Sheet: Figure 2-source data 1
Entry	Gene name	Polyclonal count	Monoclonal count
P04040	CAT	728	337	**Updated manually
P01308	INS	44109	10896	**Updated manually
Q96S52	PIGS UNQ1873/PRO4316	2665	875	**Updated manually
P42768	WAS IMD2	9822	6354
Q99218	AMELY AMGL AMGY	7787	1701
Q96AT9	RPE HUSSY-17	6769	5870
P10275	AR DHTR NR3C4	3047	896
P00533	EGFR ERBB ERBB1 HER1	2585	1864
P20132	SDS SDH	2517	1440
P25054	APC DP2.5	2182	17586
P02743	APCS PTX2	2170	17440
P22304	IDS SIDS	2075	478
P14735	IDE	2075	481
P01375	TNF TNFA TNFSF2	2030	3653
P30990	NTS	2012	387
P00918	CA2	1859	157
P05412	JUN	1707	402
P01024	C3 CPAMD1	1645	3268
P01106	MYC BHLHE39	1558	1452
O43593	HR	1546	396
P11498	PC	1537	729
Q86TI0	TBC1D1 KIAA1108	1518	3
P31749	AKT1 PKB RAC	1465	898
P05067	APP A4 AD1	1299	637
Q01105	SET	1225	534
O15067	PFAS KIAA0361	1191	364
P15336	ATF2 CREB2 CREBP1	1133	216
P02649	APOE	1114	694
Q92934	BAD BBC6 BCL2L8	1100	253
P10721	KIT SCFR	1087	2324
P30301	MIP AQP0	1038	467
P08581	MET	1016	494
P10415	BCL2	1006	671
P35568	IRS1	991	122
P40763	STAT3 APRF	914	535
P01133	EGF	894	861
P04406	GAPDH GAPD CDABP0047 OK/SW-cl.12	864	773
O14556	GAPDHS GAPD2 GAPDH2 GAPDS HSD-35 HSD35	862	773
P12931	SRC SRC1	857	548
P38398	BRCA1 RNF53	855	357
Q9BXM0	PRX KIAA1620	833	58
P60484	PTEN MMAC1 TEP1	833	373
P25445	FAS APT1 FAS1 TNFRSF6	813	2588
P07108	DBI	808	396
P42224	STAT1	803	564
P04637	TP53 P53	801	924
P04626	ERBB2 HER2 MLN19 NEU NGL	798	972
Q13153	PAK1	786	132
P10636	MAPT MAPTL MTBT1 TAU	777	301
P42345	MTOR FRAP FRAP1 FRAP2 RAFT1 RAPT1	709	203
P84022	SMAD3 MADH3	697	242
P01100	FOS G0S7	685	424
P04049	RAF1 RAF	679	226
Q9UM73	ALK	662	366
Q04206	RELA NFKB3	660	148
P49815	TSC2 TSC4	659	135
P02768	ALB GIG20 GIG42 PRO0903 PRO1708 PRO2044 PRO2619 PRO2675 UNQ696/PRO1341	656	448
P42229	STAT5A STAT5	651	280
P19838	NFKB1	646	124
Q15796	SMAD2 MADH2 MADR2	641	270
P11362	FGFR1 BFGFR CEK FGFBR FLG FLT2 HBGFR	631	314
P49675	STAR STARD1	630	49
P31751	AKT2	624	317
P42226	STAT6	616	379
P09871	C1S	615	714
P30304	CDC25A	609	188
P14136	GFAP	597	1189
Q00987	MDM2	596	254
P14679	TYR	594	361
P00450	CP	587	304
Q15118	PDK1 PDHK1	565	126
P02741	CRP PTX1	562	792
P06681	C2	559	2602
P19419	ELK1	558	131
Q07812	BAX BCL2L4	557	562
P02774	GC	556	402
P29966	MARCKS MACS PRKCSL	555	128
P55957	BID	542	237
Q13177	PAK2	542	88
Q02750	MAP2K1 MEK1 PRKMK1	542	234
P43405	SYK	538	458
P61073	CXCR4	538	550
P08100	RHO OPN2	537	263
P23443	RPS6KB1 STK14A	530	147
P01138	NGF NGFB	519	386
P06239	LCK	519	420
Q04864	REL	518	129
Q13315	ATM	517	501
P12004	PCNA	514	819
P39905	GDNF	510	47
P23560	BDNF	506	172
P06493	CDK1 CDC2 CDC28A CDKN1 P34CDC2	500	328
Q13547	HDAC1 RPD3L1	500	241
P35222	CTNNB1 CTNNB OK/SW-cl.35 PRO2286	497	461
P49913	CAMP CAP18 FALL39 HSD26	493	248
P00540	MOS	492	3474
P00519	ABL1 ABL JTK7	487	109
P00441	SOD1	486	209
Q12778	FOXO1 FKHR FOXO1A	480	144
Q8N726	CDKN2A CDKN2 MLM	479	261
P42771	CDKN2A CDKN2 MTS1	479	261
P24941	CDK2 CDKN2	479	363
P27361	MAPK3 ERK1 PRKM3	473	280
O60674	JAK2	468	97
P06400	RB1	467	438
Q05397	PTK2 FAK FAK1	465	224
P00734	F2	464	1769
P14780	MMP9 CLG4B	463	374
P08069	IGF1R	463	294
P00738	HP	456	981
P22681	CBL CBL2 RNF55	449	782
Q9Y573	IPP KLHL27	447	420
P35968	KDR FLK1 VEGFR2	446	315
P02787	TF PRO1400	446	334
P46527	CDKN1B KIP1	438	195
P08047	SP1 TSFP1	437	240
P50552	VASP	432	153
Q02078	MEF2A MEF2	431	183
Q13541	EIF4EBP1	427	213
Q9Y243	AKT3 PKBG	426	288
P36888	FLT3 CD135 FLK2 STK1	426	357
P16234	PDGFRA PDGFR2 RHEPDGFRA	425	221
Q9NR28	DIABLO SMAC	424	163
P56524	HDAC4 KIAA0288	422	112
Q13480	GAB1	422	88
Q16539	MAPK14 CSBP CSBP1 CSBP2 CSPB1 MXI2 SAPK2A	420	158
Q07817	BCL2L1 BCL2L BCLX	419	280
P55211	CASP9 MCH6	419	123
Q9BZS1	FOXP3 IPEX JM2	416	911
P03372	ESR1 ESR NR3A1	413	400
P11802	CDK4	411	486
Q7LC44	ARC KIAA0278	411	1338
Q00613	HSF1 HSTF1	410	384
Q9H9S0	NANOG	409	307
P02686	MBP	409	542
P12821	ACE DCP DCP1	408	703
P17275	JUNB	408	36
Q99836	MYD88	407	75
P37840	SNCA NACP PARK1	407	253
Q8NER1	TRPV1 VR1	405	48
Q9UNA4	POLI RAD30B	404	200
Q13535	ATR FRP1	404	100
P05231	IL6 IFNB2	399	592
P08253	MMP2 CLG4A	395	401
Q14765	STAT4	394	227
Q15797	SMAD1 BSP1 MADH1 MADR1	394	202
P10242	MYB	394	227
Q92769	HDAC2	393	90
P17677	GAP43	393	146
P28482	MAPK1 ERK2 PRKM1 PRKM2	392	265
P26358	DNMT1 AIM CXXC9 DNMT	389	234
P07949	RET CDHF12 CDHR16 PTC RET51	384	266
P09619	PDGFRB PDGFR PDGFR1	384	245
P56817	BACE1 BACE KIAA1149	381	65
P07101	TH TYH	381	370
P05019	IGF1 IBP1	380	270
P98177	FOXO4 AFX AFX1 MLLT7	380	38
P06730	EIF4E EIF4EL1 EIF4F	377	118
P62826	RAN ARA24 OK/SW-cl.81	376	67
P10147	CCL3 G0S19-1 MIP1A SCYA3	376	261
O14727	APAF1 KIAA0413	375	115
Q9UER7	DAXX BING2 DAP6	374	182
P27708	CAD	370	97
P02771	AFP HPAFP	370	918
Q06609	RAD51 RAD51A RECA	370	276
P49841	GSK3B	369	269
Q13938	CAPS	367	424
P04792	HSPB1 HSP27 HSP28	366	263
P26441	CNTF	365	71
O15392	BIRC5 API4 IAP4	365	178
Q13158	FADD MORT1 GIG3	365	303
Q14790	CASP8 MCH5	364	182
Q07820	MCL1 BCL2L3	364	240
P16220	CREB1	362	172
P53350	PLK1 PLK	360	302
Q9UQL6	HDAC5 KIAA0600	358	46
P21860	ERBB3 HER3	358	480
O00206	TLR4	356	907
O60603	TLR2 TIL4	355	1316
P15976	GATA1 ERYF1 GF1	354	97
Q9Y210	TRPC6 TRP6	353	22
P09936	UCHL1	350	614
Q01094	E2F1 RBBP3	349	233
P49736	MCM2 BM28 CCNL1 CDCL1 KIAA0030	348	251
O75943	RAD17 R24L	347	97
Q5S007	LRRK2 PARK8	346	223
P48431	SOX2	345	257
P21802	FGFR2 BEK KGFR KSAM	345	138
P25963	NFKBIA IKBA MAD3 NFKBI	344	154
P17600	SYN1	341	101
O60313	OPA1 KIAA0567	341	50
Q9NYK1	TLR7 UNQ248/PRO285	338	169
P52630	STAT2	337	133
P11274	BCR BCR1 D22S11	337	127
P03956	MMP1 CLG	336	164
Q9BYF1	ACE2 UNQ868/PRO1885	335	83
P62993	GRB2 ASH	335	249
P17302	GJA1 GJAL	333	65
Q9H1Y0	ATG5 APG5L ASP	332	160
P49137	MAPKAPK2	332	121
O14757	CHEK1 CHK1	331	132
P62753	RPS6 OK/SW-cl.2	331	132
P30307	CDC25C	330	300
O15455	TLR3	330	328
P25942	CD40 TNFRSF5	329	2135
P15692	VEGFA VEGF	329	291
O14618	CCS	326	170
Q15418	RPS6KA1 MAPKAPK1A RSK1	325	136
P02647	APOA1	324	178
P53667	LIMK1 LIMK	323	119
P49238	CX3CR1 CMKBRL1 GPR13	322	208
P43403	ZAP70 SRK	321	556
Q99704	DOK1	320	10
P63000	RAC1 TC25 MIG5	319	75
P60953	CDC42	318	84
Q9NR96	TLR9 UNQ5798/PRO19605	318	385
Q06413	MEF2C	317	71
P11137	MAP2	316	327
Q96EB6	SIRT1 SIR2L1	316	193
O43561	LAT	316	323
Q14653	IRF3	314	206
P07948	LYN JTK8	314	245
P98170	XIAP API3 BIRC4 IAP3	314	80
P01270	PTH	313	465
Q99683	MAP3K5 ASK1 MAPKKK5 MEKK5	311	79
P78536	ADAM17 CSVP TACE	309	58
P28329	CHAT	307	69
Q12933	TRAF2 TRAP3	307	95
P16070	CD44 LHR MDU2 MDU3 MIC4	306	3396
P06241	FYN	306	288
P28300	LOX	305	230
P41159	LEP OB OBS	305	231
P17661	DES	305	423
O96013	PAK4 KIAA1142	304	57
P51617	IRAK1 IRAK	303	75
O00273	DFFA DFF1 DFF45 H13	303	81
Q01201	RELB	302	75
O15530	PDPK1 PDK1	301	94
P48061	CXCL12 SDF1 SDF1A SDF1B	301	92
O75553	DAB1	299	32
P15941	MUC1 PUM	299	1273
Q00534	CDK6 CDKN6	299	238
P49840	GSK3A	299	187
Q05066	SRY TDF	299	90
P01282	VIP	298	89
O95352	ATG7 APG7L	297	48
P30305	CDC25B CDC25HU2	297	75
Q05586	GRIN1 NMDAR1	296	68
Q9H4A3	WNK1 HSN2 KDP KIAA0344 PRKWNK1	295	16
P51692	STAT5B	295	181
P01189	POMC	294	169
P38432	COIL CLN80	293	97
P61244	MAX BHLHD4	293	80
Q06124	PTPN11 PTP2C SHPTP2	293	93
Q9NYA1	SPHK1 SK1 SPHK SPK	292	40
P50613	CDK7 CAK CAK1 CDKN7 MO15 STK1	291	219
P13500	CCL2 MCP1 SCYA2	289	388
Q9Y5Z0	BACE2 AEPLC ALP56 ASP21 CDA13 UNQ418/PRO852	287	5
P51681	CCR5 CMKBR5	286	729
P00747	PLG	286	323
P29474	NOS3	286	79
Q00535	CDK5 CDKN5	286	259
Q92574	TSC1 KIAA0243 TSC	286	60
P04179	SOD2	286	215
P01584	IL1B IL1F2	285	308
Q01196	RUNX1 AML1 CBFA2	285	204
P09341	CXCL1 GRO GRO1 GROA MGSA SCYB1	285	91
P60880	SNAP25 SNAP	284	264
P51685	CCR8 CKRL1 CMKBR8 CMKBRL2	283	115
P18848	ATF4 CREB2 TXREB	283	111
P01730	CD4	283	7409
O96017	CHEK2 CDS1 CHK2 RAD53	283	225
O75762	TRPA1 ANKTM1	282	25
P01009	SERPINA1 AAT PI PRO0684 PRO2209	281	194
P42574	CASP3 CPP32	280	260
Q15303	ERBB4 HER4	280	238
Q13501	SQSTM1 ORCA OSIL	280	131
Q16620	NTRK2 TRKB	279	97
P23458	JAK1 JAK1A JAK1B	279	79
Q96DT6	ATG4C APG4C AUTL1 AUTL3	278	23
Q9NWZ3	IRAK4	277	131
Q969D9	TSLP	277	145
P38936	CDKN1A CAP20 CDKN1 CIP1 MDA6 PIC1 SDI1 WAF1	276	242
Q9NQU5	PAK6 PAK5	276	5
P08254	MMP3 STMY1	276	287
Q15125	EBP	276	155
P78423	CX3CL1 FKN NTT SCYD1 A-152E5.2	274	97
P29597	TYK2	274	123
P21579	SYT1 SVP65 SYT	274	84
P50750	CDK9 CDC2L4 TAK	273	89
P20226	TBP GTF2D1 TF2D TFIID	272	157
Q15848	ADIPOQ ACDC ACRP30 APM1 GBP28	271	293
P19174	PLCG1 PLC1	271	150
Q6R327	RICTOR KIAA1999	271	87
P13501	CCL5 D17S136E SCYA5	270	145
P60568	IL2	270	1172
Q9NRI5	DISC1 KIAA0457	270	15
P49757	NUMB C14orf41	269	81
P02144	MB	268	6602
P01033	TIMP1 CLGI TIMP	268	256
O94759	TRPM2 EREG1 KNP3 LTRPC2 TRPC7	265	2
P49023	PXN	265	141
P01031	C5 CPAMD4	264	3002
O15379	HDAC3	264	161
O60602	TLR5 TIL3	264	238
P45983	MAPK8 JNK1 PRKM8 SAPK1 SAPK1C	263	205
P58753	TIRAP MAL	263	77
Q9UBN7	HDAC6 KIAA0901 JM21	262	93
O15524	SOCS1 SSI1 TIP3	260	23
P05121	SERPINE1 PAI1 PLANH1	260	252
Q03135	CAV1 CAV	260	106
Q13418	ILK ILK1 ILK2	260	103
P14210	HGF HPTA	259	218
P63165	SUMO1 SMT3C SMT3H3 UBL1 OK/SW-cl.43	259	88
Q99497	PARK7	258	137
Q13224	GRIN2B NMDAR2B	258	52
P47804	RGR	258	4
Q9Y4K3	TRAF6 RNF85	258	93
Q13131	PRKAA1 AMPK1	257	106
Q9BXM7	PINK1	256	129
O15519	CFLAR CASH CASP8AP1 CLARP MRIT	256	81
P46531	NOTCH1 TAN1	256	387
P60709	ACTB	256	218
P04629	NTRK1 MTC TRK TRKA	255	93
O94817	ATG12 APG12 APG12L	255	77
O43524	FOXO3 FKHRL1 FOXO3A	255	111
Q676U5	ATG16L1 APG16L UNQ9393/PRO34307	254	25
P78527	PRKDC HYRC HYRC1	254	195
Q9HD89	RETN FIZZ3 HXCP1 RSTN UNQ407/PRO1199	254	92
P50281	MMP14	253	112
P16885	PLCG2	253	67
P29475	NOS1	253	87
P09038	FGF2 FGFB	253	278
P28906	CD34	252	2063
P09429	HMGB1 HMG1	252	337
O43521	BCL2L11 BIM	251	93
P06881	CALCA CALC1	250	256
P01258	CALCA CALC1	250	256
P48436	SOX9	250	105
Q53EL6	PDCD4 H731	249	111
P46937	YAP1 YAP65	249	131
Q06187	BTK AGMX1 ATK BPK	248	304
Q92844	TANK ITRAF TRAF2	248	33
Q8N6T7	SIRT6 SIR2L6	248	32
Q15399	TLR1 KIAA0012	247	183
Q04759	PRKCQ PRKCT	247	31
Q15628	TRADD	247	103
P51679	CCR4 CMKBR4	246	170
P23588	EIF4B	246	58
P29353	SHC1 SHC SHCA	246	152
P45985	MAP2K4 JNKK1 MEK4 MKK4 PRKMK4 SEK1 SERK1 SKK1	245	132
P35240	NF2 SCH	245	43
Q99626	CDX2 CDX3	245	182
P41181	AQP2	243	4
P09874	PARP1 ADPRT PPOL	243	230
P17535	JUND	241	27
Q9BY41	HDAC8 HDACL1 CDA07	241	69
P16671	CD36 GP3B GP4	241	1037
P05112	IL4	241	676
P04628	WNT1 INT1	241	47
O75914	PAK3 OPHN3	240	97
Q8WUI4	HDAC7 HDAC7A	240	41
P14174	MIF GLIF MMIF	239	173
Q9C035	TRIM5 RNF88	239	52
O75116	ROCK2 KIAA0619	239	67
Q13950	RUNX2 AML3 CBFA1 OSF2 PEBP2A	239	204
P11413	G6PD	238	72
P54764	EPHA4 HEK8 SEK TYRO1	238	78
Q16654	PDK4 PDHK4	237	30
P27986	PIK3R1 GRB1	237	118
Q14289	PTK2B FAK2 PYK2 RAFTK	237	117
P46109	CRKL	236	129
Q9UQM7	CAMK2A CAMKA KIAA0968	236	122
O95831	AIFM1 AIF PDCD8	236	19
Q9BXW9	FANCD2 FACD	236	93
O94907	DKK1 UNQ492/PRO1008	235	168
P05164	MPO	235	487
P15090	FABP4	235	181
P29317	EPHA2 ECK	235	194
P16949	STMN1 C1orf215 LAP18 OP18	234	75
P52333	JAK3	233	208
P61586	RHOA ARH12 ARHA RHO12	233	160
P09237	MMP7 MPSL1 PUMP1	233	91
Q15139	PRKD1 PKD PKD1 PRKCM	233	42
Q8WV28	BLNK BASH SLP65	233	91
P27695	APEX1 APE APE1 APEX APX HAP1 REF1	233	99
P04114	APOB	232	166
O43464	HTRA2 OMI PRSS25	232	201
P24864	CCNE1 CCNE	232	105
O14746	TERT EST2 TCS1 TRT	231	50
P30530	AXL UFO	231	179
Q7Z2W7	TRPM8 LTRPC6 TRPP8	231	19
Q86TL0	ATG4D APG4D AUTL4	230	24
Q9UQC2	GAB2 KIAA0571	230	50
P01583	IL1A IL1F1	230	171
P52945	PDX1 IPF1 STF1	230	82
P30291	WEE1	230	38
O94776	MTA2 MTA1L1 PID	229	25
P20783	NTF3	229	36
P02778	CXCL10 INP10 SCYB10	229	167
P15498	VAV1 VAV	229	100
P04275	VWF F8VWF	229	261
P55210	CASP7 MCH3	228	131
P51608	MECP2	228	99
P16035	TIMP2	228	288
P53671	LIMK2	228	41
P45452	MMP13	228	202
O15111	CHUK IKKA TCF16	228	141
P08138	NGFR TNFRSF16	228	337
P35869	AHR BHLHE76	227	188
P29590	PML MYL PP8675 RNF71 TRIM19	227	110
P04070	PROC	227	129
P01275	GCG	227	149
P00352	ALDH1A1 ALDC ALDH1 PUMB1	227	114
P49768	PSEN1 AD3 PS1 PSNL1	226	80
P29323	EPHB2 DRT EPHT3 EPTH3 ERK HEK5 TYRO5	226	125
P42261	GRIA1 GLUH1 GLUR1	226	53
P26927	MST1 D3F15S2 DNF15S2 HGFL	224	66
O43918	AIRE APECED	223	34
P18754	RCC1 CHC1	223	75
P07332	FES FPS	223	406
Q15744	CEBPE	223	116
P29350	PTPN6 HCP PTP1C	223	136
P16219	ACADS	222	23
P49959	MRE11 HNGS1 MRE11A	222	57
Q9Y2C9	TLR6	222	294
Q92597	NDRG1 CAP43 DRG1 RTP	222	87
P19957	PI3 WAP3 WFDC14	222	202
P22301	IL10	222	540
P20711	DDC AADC	222	34
P54762	EPHB1 ELK EPHT2 HEK6 NET	221	40
O15516	CLOCK BHLHE8 KIAA0334	220	57
P05362	ICAM1	220	937
O00141	SGK1 SGK	220	90
P01344	IGF2 PP1446	220	60
P19875	CXCL2 GRO2 GROB MIP2A SCYB2	220	23
P15056	BRAF BRAF1 RAFB1	219	262
P43246	MSH2	219	251
P02751	FN1 FN	219	362
Q13507	TRPC3 TRP3	219	2
Q8NET8	TRPV3	218	97
Q9UIK4	DAPK2	217	71
P51677	CCR3 CMKBR3	217	283
Q02224	CENPE	217	150
Q8N2Z9	CENPS APITD1 FAAP16 MHF1	217	150
P40692	MLH1 COCA2	217	226
Q01860	POU5F1 OCT3 OCT4 OTF3	217	146
Q15910	EZH2 KMT6	217	132
P36507	MAP2K2 MEK2 MKK2 PRKMK2	217	83
Q13485	SMAD4 DPC4 MADH4	217	268
Q9NZC7	WWOX FOR SDR41C1 WOX1	217	6
Q9UBB5	MBD2	215	32
P10828	THRB ERBA2 NR1A2 THR1	215	45
O75385	ULK1 KIAA0722	215	49
P17948	FLT1 FLT FRT VEGFR1	215	150
P29965	CD40LG CD40L TNFSF5 TRAP	214	622
P29466	CASP1 IL1BC IL1BCE	214	67
Q9H492	MAP1LC3A	214	69
Q92731	ESR2 ESTRB NR3A2	214	101
P01236	PRL	214	403
P17252	PRKCA PKCA PRKACA	214	155
P14635	CCNB1 CCNB	214	149
Q9Y4P1	ATG4B APG4B AUTL1 KIAA0943	213	35
O76075	DFFB CAD DFF2 DFF40	212	51
Q02297	NRG1 GGF HGL HRGA NDF SMDF	212	102
P49662	CASP4 ICH2	212	46
P08571	CD14	212	2844
P19525	EIF2AK2 PKR PRKR	212	101
P21980	TGM2	212	200
O43542	XRCC3	212	85
P18850	ATF6	211	75
O43474	KLF4 EZF GKLF	211	125
P05230	FGF1 FGFA	211	96
P25205	MCM3	211	95
O43187	IRAK2	211	89
Q9Y6K1	DNMT3A	211	112
P41279	MAP3K8 COT ESTF	210	21
P33991	MCM4 CDC21	210	28
O14920	IKBKB IKKB	210	139
P06733	ENO1 ENO1L1 MBPB1 MPB1	210	126
P41240	CSK	210	145
P49795	RGS19 GAIP GNAI3IP	210	11
Q9BXH1	BBC3 PUMA	209	34
Q9UBE0	SAE1 AOS1 SUA1 UBLE1A	209	61
P46108	CRK	209	119
Q96PG8	BBC3 PUMA	209	34
P24385	CCND1 BCL1 PRAD1	209	261
Q14457	BECN1 GT197	208	86
Q13114	TRAF3 CAP1 CRAF1	208	57
P07550	ADRB2 ADRB2R B2AR	207	28
P02753	RBP4 PRO2222	207	339
O14672	ADAM10 KUZ MADM	207	83
P41597	CCR2 CMKBR2	206	261
Q99542	MMP19 MMP18 RASI	206	12
P46092	CCR10 GPR2	206	55
P55212	CASP6 MCH2	206	76
P17861	XBP1 TREB5 XBP2	206	116
Q92985	IRF7	205	93
Q99933	BAG1 HAP	205	129
Q16611	BAK1 BAK BCL2L7 CDN1	205	44
P18887	XRCC1	205	162
O75581	LRP6	204	70
P22894	MMP8 CLG1	204	54
P09104	ENO2	204	338
P02511	CRYAB CRYA2 HSPB5	204	213
P11912	CD79A IGA MB1	203	699
Q00653	NFKB2 LYT10	203	36
Q9Y5Y7	LYVE1 CRSBP1 HAR XLKD1 UNQ230/PRO263	203	117
P05106	ITGB3 GP3A	203	437
P06401	PGR NR3C3	202	574
Q14676	MDC1 KIAA0170 NFBD1	202	62
O95835	LATS1 WARTS	202	24
Q04637	EIF4G1 EIF4F EIF4G EIF4GI	202	54
O60496	DOK2	202	23
Q96QT4	TRPM7 CHAK1 LTRPC7	202	56
P05771	PRKCB PKCB PRKCB1	201	52
P23528	CFL1 CFL	201	72
P11831	SRF	201	95
Q13323	BIK NBK	200	37
P05198	EIF2S1 EIF2A	200	115
O95166	GABARAP FLC3B HT004	200	33
P27797	CALR CRTC	200	86
Q9HBA0	TRPV4 VRL2 VROAC	200	0
Q96LC9	BMF	199	50
P35625	TIMP3	199	49
P19438	TNFRSF1A TNFAR TNFR1	199	142
O60238	BNIP3L BNIP3A BNIP3H NIX	198	38
P14921	ETS1 EWSR2	198	115
Q9BXL7	CARD11 CARMA1	198	25
Q9NPH5	NOX4 RENOX	197	25
O14965	AURKA AIK AIRK1 ARK1 AURA AYK1 BTAK IAK1 STK15 STK6	196	94
P02748	C9	195	2004
P37231	PPARG NR1C3	195	65
P10645	CHGA	195	241
O95819	MAP4K4 HGK KIAA0687 NIK	195	100
Q9Y2X7	GIT1	195	63
O75173	ADAMTS4 KIAA0688 UNQ769/PRO1563	195	25
P15391	CD19	195	3851
P25490	YY1 INO80S	195	145
Q9UKE5	TNIK KIAA0551	195	52
P17936	IGFBP3 IBP3	194	78
P23219	PTGS1 COX1	194	96
Q08345	DDR1 CAK EDDR1 NEP NTRK4 PTK3A RTK6 TRKE	194	53
Q13363	CTBP1 CTBP	194	62
O43653	PSCA UNQ206/PRO232	194	28
Q13526	PIN1	193	203
P10646	TFPI LACI TFPI1	193	117
P17735	TAT	192	133
P01579	IFNG	192	640
P19484	TFEB BHLHE35	192	58
Q9HBE4	IL21	192	114
P12643	BMP2 BMP2A	192	92
P54132	BLM RECQ2 RECQL3	191	42
P01127	PDGFB PDGF2 SIS	191	25
Q05655	PRKCD	191	132
Q15750	TAB1 MAP3K7IP1	191	70
P51587	BRCA2 FACD FANCD1	190	83
P42575	CASP2 ICH1 NEDD2	190	121
P42262	GRIA2 GLUR2	190	44
P06213	INSR	190	211
P22303	ACHE	190	148
Q99873	PRMT1 HMT2 HRMT1L2 IR1B4	189	73
Q9HC29	NOD2 CARD15 IBD1	189	95
P06744	GPI	189	138
P01023	A2M CPAMD5 FWP007	189	93
P80098	CCL7 MCP3 SCYA6 SCYA7	188	142
P13639	EEF2 EF2	188	89
O43927	CXCL13 BCA1 BLC SCYB13	188	34
O00213	APBB1 FE65 RIR	188	26
O14763	TNFRSF10B DR5 KILLER TRAILR2 TRICK2 ZTNFR9 UNQ160/PRO186	188	162
Q02548	PAX5	187	177
P35225	IL13 NC30	187	399
O00585	CCL21 SCYA21 UNQ784/PRO1600	187	32
P35226	BMI1 PCGF4 RNF51	187	90
P06307	CCK	186	46
Q14416	GRM2 GPRC1B MGLUR2	186	16
Q9UKV0	HDAC9 HDAC7 HDAC7B HDRP KIAA0744 MITR	186	41
P08238	HSP90AB1 HSP90B HSPC2 HSPCB	186	93
P35354	PTGS2 COX2	186	125
Q9UBU3	GHRL MTLRP UNQ524/PRO1066	186	172
P11310	ACADM	186	43
O43281	EFS CASS3	186	61
P07333	CSF1R FMS	185	150
Q15843	NEDD8	185	61
Q16543	CDC37 CDC37A	185	102
O75444	MAF	185	102
P01266	TG	185	514
P06748	NPM1 NPM	185	174
P01588	EPO	185	334
Q9BY76	ANGPTL4 ARP4 HFARP PGAR PP1158 PSEC0166 UNQ171/PRO197	184	54
Q14194	CRMP1 DPYSL1 ULIP3	184	34
P00749	PLAU	184	153
Q9Y5S1	TRPV2 VRL	184	2
P51843	NR0B1 AHC DAX1	183	65
Q04721	NOTCH2	183	77
P35558	PCK1 PEPCK1	183	57
P18075	BMP7 OP1	183	148
P49789	FHIT	183	143
Q08289	CACNB2 CACNLB2 MYSB	183	88
Q9UQE7	SMC3 BAM BMH CSPG6 SMC3L1	183	35
P13671	C6	182	2328
P12272	PTHLH PTHRP	182	62
P42830	CXCL5 ENA78 SCYB5	182	109
Q9UHD2	TBK1 NAK	182	126
Q96KB5	PBK TOPK	181	218
Q13330	MTA1	181	92
P35611	ADD1 ADDA	181	72
P56945	BCAR1 CAS CASS1 CRKAS	181	100
P50591	TNFSF10 APO2L TRAIL	181	183
P15923	TCF3 BHLHB21 E2A ITF1	181	84
P09769	FGR SRC2	180	178
Q02556	IRF8 ICSBP1	180	39
Q16531	DDB1 XAP1	180	65
P01112	HRAS HRAS1	180	116
P09486	SPARC ON	180	166
Q92878	RAD50	180	75
Q96QU6	ACCS PHACS	180	28
O00418	EEF2K	180	43
Q08499	PDE4D DPDE3	180	7
Q05513	PRKCZ PKC2	179	53
O14867	BACH1	179	52
P51512	MMP16 C8orf57 MMPX2	179	11
Q13563	PKD2 TRPP2	179	31
P07288	KLK3 APS	179	609
O43318	MAP3K7 TAK1	179	46
Q9H6X2	ANTXR1 ATR TEM8	179	24
P16455	MGMT	179	204
P18507	GABRG2	179	8
P40337	VHL	179	141
P13569	CFTR ABCC7	178	202
O75928	PIAS2 PIASX	178	34
Q15759	MAPK11 PRKM11 SAPK2 SAPK2B	178	62
Q9HC16	APOBEC3G MDS019	177	36
Q9Y6K9	IKBKG FIP3 NEMO	177	88
P05181	CYP2E1 CYP2E	177	36
O95644	NFATC1 NFAT2 NFATC	177	70
O75030	MITF BHLHE32	177	192
Q9UKV3	ACIN1 ACINUS KIAA0670	176	13
O43184	ADAM12 MLTN UNQ346/PRO545	176	48
O15527	OGG1 MMH MUTM OGH1	176	25
Q12948	FOXC1 FKHL7 FREAC3	176	33
P14867	GABRA1	176	18
Q13148	TARDBP TDP43	176	106
P01137	TGFB1 TGFB	176	253
P02788	LTF GIG12 LF	176	212
Q8WYN0	ATG4A APG4A AUTL2	175	23
P43490	NAMPT PBEF PBEF1	175	102
Q01543	FLI1	175	128
P61956	SUMO2 SMT3B SMT3H2	175	70
P30260	CDC27 ANAPC3 D0S1430E D17S978E	174	68
P18846	ATF1	174	100
P13236	CCL4 LAG1 MIP1B SCYA4	174	105
Q16566	CAMK4 CAMK CAMK-GR CAMKIV	174	49
P05783	KRT18 CYK18 PIG46	174	474
P01019	AGT SERPINA8	174	107
Q7Z3C6	ATG9A APG9L1	174	37
Q9NTG7	SIRT3 SIR2L3	174	38
O00592	PODXL PCLP PCLP1	174	95
Q15121	PEA15	173	2
P39748	FEN1 RAD2	173	86
P35228	NOS2 NOS2A	173	84
P63104	YWHAZ	173	24
Q86X55	CARM1 PRMT4	172	42
P11166	SLC2A1 GLUT1	172	40
P04150	NR3C1 GRL	172	106
O14744	PRMT5 HRMT1L5 IBP72 JBP1 SKB1	171	56
Q04912	MST1R PTK8 RON	171	81
P09923	ALPI	171	45
P01303	NPY	171	78
P33993	MCM7 CDC47 MCM2	171	191
P10451	SPP1 BNSP OPN PSEC0156	171	191
P32248	CCR7 CMKBR7 EBI1 EVI1	171	628
P41235	HNF4A HNF4 NR2A1 TCF14	171	108
P26447	S100A4 CAPL MTS1	171	81
Q9H0E2	TOLLIP	171	111
P22736	NR4A1 GFRP1 HMR NAK1	170	49
Q9UK53	ING1	170	114
Q9GZX6	IL22 ILTIF ZCYTO18 UNQ3099/PRO10096	170	65
P20273	CD22 SIGLEC2	170	1701
P09238	MMP10 STMY2	170	59
Q13309	SKP2 FBXL1	170	49
P15559	NQO1 DIA4 NMOR1	170	213
P39900	MMP12 HME	170	65
Q9NT62	ATG3 APG3 APG3L	170	75
P06127	CD5 LEU1	169	3182
P32247	BRS3	169	2
P17844	DDX5 G17P1 HELR HLR1	169	42
Q99741	CDC6 CDC18L	169	191
Q13464	ROCK1	169	135
Q8N884	CGAS C6orf150 MB21D1	168	329
O95429	BAG4 SODD	168	20
P33241	LSP1 WP34	168	50
P13725	OSM	168	59
Q07954	LRP1 A2MR APR	168	204
P35637	FUS TLS	168	76
P01215	CGA	168	337
P54646	PRKAA2 AMPK AMPK2	168	41
Q15831	STK11 LKB1 PJS	168	54
Q15109	AGER RAGE	168	92
Q13761	RUNX3 AML2 CBFA3 PEBP2A3	168	68
P21964	COMT	167	49
Q13255	GRM1 GPRC1A MGLUR1	167	67
Q13469	NFATC2 NFAT1 NFATP	167	57
Q06710	PAX8	167	162
P11309	PIM1	167	204
P08709	F7	167	1789
P00740	F9	167	2157
P01135	TGFA	167	55
P19429	TNNI3 TNNC1	167	485
P35372	OPRM1 MOR1	167	15
Q9NQC7	CYLD CYLD1 KIAA0849 HSPC057	166	55
Q9C0C7	AMBRA1 KIAA1736	166	5
P45984	MAPK9 JNK2 PRKM9 SAPK1A	166	131
Q8IXJ6	SIRT2 SIR2L SIR2L2	166	86
P05023	ATP1A1	166	77
Q9Y261	FOXA2 HNF3B TCF3B	166	243
P12644	BMP4 BMP2B DVR4	166	125
P61764	STXBP1 UNC18A	166	44
Q9UEW8	STK39 SPAK	166	56
P25440	BRD2 KIAA9001 RING3	165	67
Q8NBP7	PCSK9 NARC1 PSEC0052	165	66
P46734	MAP2K3 MEK3 MKK3 PRKMK3 SKK2	165	113
Q14192	FHL2 DRAL SLIM3	165	47
P11308	ERG	165	79
P17987	TCP1 CCT1 CCTA	165	280
P61769	B2M CDABP0092 HDCMA22P	164	500
P26367	PAX6 AN2	164	108
Q96FX8	PERP KCP1 KRTCAP1 PIGPC1 THW	164	8
O75899	GABBR2 GPR51 GPRC3B	164	48
P23771	GATA3	164	213
Q8TDC3	BRSK1 KIAA1811 SAD1 SADB	164	9
O00548	DLL1 UNQ146/PRO172	164	147
P08247	SYP	164	303
Q12884	FAP	164	83
P23025	XPA XPAC	164	141
P25098	GRK2 ADRBK1 BARK BARK1	163	41
Q16665	HIF1A BHLHE78 MOP1 PASD8	163	190
P05787	KRT8 CYK8	163	343
Q04771	ACVR1 ACVRLK2	163	32
P51452	DUSP3 VHR	163	53
P54760	EPHB4 HTK MYK1 TYRO11	163	159
P51451	BLK	162	131
P45973	CBX5 HP1A	162	55
Q99259	GAD1 GAD GAD67	162	95
P52701	MSH6 GTBP	162	237
Q14680	MELK KIAA0175	162	30
P02652	APOA2	162	74
P52735	VAV2	162	52
O14788	TNFSF11 OPGL RANKL TRANCE	162	126
Q93009	USP7 HAUSP	162	84
P27824	CANX	161	48
P00505	GOT2	161	72
P36894	BMPR1A ACVRLK3 ALK3	161	33
Q13257	MAD2L1 MAD2	161	102
P20333	TNFRSF1B TNFBR TNFR2	161	213
Q13163	MAP2K5 MEK5 MKK5 PRKMK5	161	80
P04141	CSF2 GMCSF	161	475
P09601	HMOX1 HO HO1	161	124
Q13185	CBX3	161	60
P22466	GAL GAL1 GALN GLNN	161	84
P10398	ARAF ARAF1 PKS PKS2	161	60
Q9NPF5	DMAP1 KIAA1425	161	59
Q92956	TNFRSF14 HVEA HVEM UNQ329/PRO509	161	155
Q14258	TRIM25 EFP RNF147 ZNF147	161	59
O95347	SMC2 CAPE SMC2L1 PRO0324	161	27
Q15382	RHEB RHEB2	161	61
P07339	CTSD CPSD	160	160
P35221	CTNNA1	160	65
P54278	PMS2 PMSL2	160	147
Q15080	NCF4 SH3PXD4	160	50
P49682	CXCR3 GPR9	160	429
Q13283	G3BP1 G3BP	160	45
P21728	DRD1	160	37
P20309	CHRM3	160	6
P48382	RFX5	159	19
P46459	NSF	159	95
P23760	PAX3 HUP2	159	78
P09917	ALOX5 LOG5	159	20
P00338	LDHA PIG19	159	130
Q9Y616	IRAK3	159	78
P08684	CYP3A4 CYP3A3	159	25
P15311	EZR VIL2	159	118
Q96J92	WNK4 PRKWNK4	159	9
P48023	FASLG APT1LG1 CD95L FASL TNFSF6	159	285
P20396	TRH	159	11
Q9UQB8	BAIAP2	158	39
Q8TD19	NEK9 KIAA1995 NEK8 NERCC	158	32
Q2M2I8	AAK1 KIAA1048	158	16
Q13642	FHL1 SLIM1	158	74
Q99638	RAD9A	158	35
P63208	SKP1 EMC19 OCP2 SKP1A TCEB1L	158	88
P07202	TPO	158	159
Q13322	GRB10 GRBIR KIAA0207	158	24
O00311	CDC7 CDC7L1	158	100
O75844	ZMPSTE24 FACE1 STE24	158	3
P32239	CCKBR CCKRB	158	4
Q9NR97	TLR8 UNQ249/PRO286	158	205
Q9HC52	CBX8 PC3 RC1	157	35
P22607	FGFR3 JTK4	157	58
P08151	GLI1 GLI	157	80
P11473	VDR NR1I1	157	102
P05089	ARG1	156	34
P10809	HSPD1 HSP60	156	284
P21926	CD9 MIC3 TSPAN29 GIG2	156	1268
P08700	IL3	156	275
Q99717	SMAD5 MADH5	156	148
Q9NZQ7	CD274 B7H1 PDCD1L1 PDCD1LG1 PDL1	156	541
Q8IW41	MAPKAPK5 PRAK	156	50
Q9UKI8	TLK1 KIAA0137	156	35
P02763	ORM1 AGP1	155	69
Q9GZM8	NDEL1 EOPA MITAP1 NUDEL	155	26
Q14247	CTTN EMS1	155	49
P33992	MCM5 CDC46	155	138
P00558	PGK1 PGKA MIG10 OK/SW-cl.110	155	46
P51397	DAP DAP1	155	100
Q8N474	SFRP1 FRP FRP1 SARP2	155	14
Q06418	TYRO3 BYK DTK RSE SKY TIF	155	206
Q9HCS7	XAB2 HCNP KIAA1177 SYF1 PP3898	155	30
P39687	ANP32A C15orf1 LANP MAPM PHAP1	154	41
Q9UNE7	STUB1 CHIP PP1131	154	44
P30556	AGTR1 AGTR1A AGTR1B AT2R1 AT2R1B	154	20
P21554	CNR1 CNR	154	20
P20142	PGC	154	51
Q8WXG6	MADD DENN IG20 KIAA0358	154	6
P51511	MMP15	154	23
Q15306	IRF4 MUM1	154	203
Q92786	PROX1	154	98
P01241	GH1	154	319
Q8IUQ4	SIAH1 HUMSIAH	154	37
Q14693	LPIN1 KIAA0188	154	39
P15927	RPA2 REPA2 RPA32 RPA34	154	334
P13232	IL7	154	126
Q09472	EP300 P300	154	138
Q08050	FOXM1 FKHL16 HFH11 MPP2 WIN	154	126
Q9UL15	BAG5 KIAA0873	154	40
Q9UHK6	AMACR	154	151
P13726	F3	154	2303
Q9BXR5	TLR10 UNQ315/PRO358	154	66
Q96RU2	USP28 KIAA1515	154	14
Q7RTX0	TAS1R3 T1R3 TR3	154	1
Q9Y6N7	ROBO1 DUTT1	154	46
Q8TAK5	GABPB2	154	10
Q9P0L2	MARK1 KIAA1477 MARK	153	28
Q14566	MCM6	153	24
P32246	CCR1 CMKBR1 CMKR1 SCYAR1	153	85
O60934	NBN NBS NBS1 P95	153	116
Q12866	MERTK MER	153	168
Q16288	NTRK3 TRKC	153	89
P49711	CTCF	153	87
P09172	DBH	153	72
Q92851	CASP10 MCH4	153	61
P02452	COL1A1	153	80
P18433	PTPRA PTPA PTPRL2	153	3
Q9UNQ0	ABCG2 ABCP BCRP BCRP1 MXR	152	299
Q9ULZ3	PYCARD ASC CARD5 TMS1	152	23
P10643	C7	152	2191
P51684	CCR6 CKRL3 CMKBR6 GPR29 STRL22	152	320
Q9UBL9	P2RX2 P2X2	152	4
P52564	MAP2K6 MEK6 MKK6 PRKMK6 SKK3	152	86
P20336	RAB3A	152	33
P04798	CYP1A1	152	34
P11021	HSPA5 GRP78	152	85
P17181	IFNAR1 IFNAR	152	99
P56705	WNT4 UNQ426/PRO864	152	19
Q13426	XRCC4	152	20
Q13404	UBE2V1 CROC1 UBE2V UEV1 P/OKcl.19	152	8
P51671	CCL11 SCYA11	152	108
Q03060	CREM	151	23
Q92793	CREBBP CBP	151	73
Q92918	MAP4K1 HPK1	151	34
P27816	MAP4	151	11
P52292	KPNA2 RCH1 SRP1	151	40
P05556	ITGB1 FNRB MDF2 MSK12	151	545
Q15653	NFKBIB IKBB TRIP9	151	76
P04196	HRG	151	40
P60520	GABARAPL2 FLC3A GEF2	151	11
P51813	BMX	151	64
P08670	VIM	151	627
P16473	TSHR LGR3	151	106
Q13516	OLIG2 BHLHB1 BHLHE19 PRKCBP2 RACK17	151	76
O60218	AKR1B10 AKR1B11	150	94
Q12983	BNIP3 NIP3	150	39
P54257	HAP1 HAP2 HLP1	150	45
Q16270	IGFBP7 MAC25 PSF	150	24
P14598	NCF1 NOXO2 SH3PXD1A	150	9
Q08881	ITK EMT LYK	150	177
P06729	CD2 SRBC	150	2256
P10747	CD28	150	2342
Q9NQA5	TRPV5 ECAC1	150	41
P24752	ACAT1 ACAT MAT	150	36
O95786	DDX58	149	21
P11142	HSPA8 HSC70 HSP73 HSPA10	149	158
Q9NWT6	HIF1AN FIH1	149	58
P21583	KITLG MGF SCF	149	113
Q9UBC3	DNMT3B	149	89
P35367	HRH1	149	11
P09211	GSTP1 FAEES3 GST3	149	135
P06731	CEACAM5 CEA	149	454
Q99988	GDF15 MIC1 PDF PLAB PTGFB	149	50
Q96CA5	BIRC7 KIAP LIVIN MLIAP RNF50 UNQ5800/PRO19607/PRO21344	149	49
P01160	NPPA ANP PND	149	64
O75888	TNFSF13 APRIL TALL2 ZTNF2 UNQ383/PRO715	149	106
Q93038	TNFRSF25 APO3 DDR3 DR3 TNFRSF12 WSL WSL1 UNQ455/PRO779	149	76
P19544	WT1	149	242
O15287	FANCG XRCC9	149	32
P02656	APOC3	148	30
P14317	HCLS1 HS1	148	115
P78347	GTF2I BAP135 WBSCR6	148	63
O00482	NR5A2 B1F CPF FTF	148	36
P00451	F8 F8C	148	2311
Q9Y5Y6	ST14 PRSS14 SNC19 TADG15	148	23
P55851	UCP2 SLC25A8	148	9
P25874	UCP1 SLC25A7 UCP	148	51
P13051	UNG DGU UNG1 UNG15	148	103
P10082	PYY	148	27
Q9NY61	AATF CHE1 DED HSPC277	147	61
P30086	PEBP1 PBP PEBP	147	61
P42566	EPS15 AF1P	147	14
P58340	MLF1	147	20
O43293	DAPK3 ZIPK	147	32
Q99816	TSG101	147	90
P10827	THRA EAR7 ERBA1 NR1A1 THRA1 THRA2	147	91
P21796	VDAC1 VDAC	147	114
Q9UPY5	SLC7A11	147	9
P13473	LAMP2	146	415
Q9UHD4	CIDEB	146	31
Q9UM47	NOTCH3	146	99
Q12879	GRIN2A NMDAR2A	146	22
Q9Y572	RIPK3 RIP3	146	34
P43351	RAD52	146	38
Q9UJU2	LEF1	146	249
Q9Y5X9	LIPG UNQ387/PRO719	146	145
Q9NNX6	CD209 CLEC4L	146	453
Q8WZ75	ROBO4 UNQ421/PRO3674	146	18
P00813	ADA ADA1	145	82
Q9H5V8	CDCP1 TRASK UNQ2486/PRO5773	145	123
Q6IA17	SIGIRR UNQ301/PRO342	145	36
Q14934	NFATC4 NFAT3	145	15
O43353	RIPK2 CARDIAK RICK RIP2 UNQ277/PRO314/PRO34092	145	93
P49810	PSEN2 AD4 PS2 PSNL2 STM2	145	73
Q9BY44	EIF2A CDA02 MSTP004 MSTP089	145	50
O95999	BCL10 CIPER CLAP	145	237
Q15075	EEA1 ZFYVE2	145	123
P55072	VCP	145	148
Q7Z628	NET1 ARHGEF8	144	18
P01008	SERPINC1 AT3 PRO0309	144	106
Q13887	KLF5 BTEB2 CKLF IKLF	144	21
P40933	IL15	144	261
P46934	NEDD4 KIAA0093 NEDD4-1 PIG53	144	32
Q9Y4A5	TRRAP PAF400	144	4
Q13127	REST NRSF XBR	144	53
P15531	NME1 NDPKA NM23	144	160
Q9NR61	DLL4 UNQ1895/PRO4341	144	145
Q9NQS1	AVEN	144	50
P49915	GMPS	144	530
P25025	CXCR2 IL8RB	144	267
P04004	VTN	144	177
Q9UBN4	TRPC4	144	46
P07766	CD3E T3E	143	1395
P98161	PKD1	143	3
Q96D31	ORAI1 CRACM1 TMEM142A	143	41
Q9NRC8	SIRT7 SIR2L7	143	13
P43694	GATA4	143	75
Q14249	ENDOG	143	51
P15018	LIF HILDA	143	77
Q7KZI7	MARK2 EMK1	143	42
O43866	CD5L API6 UNQ203/PRO229	143	41
O43541	SMAD6 MADH6	143	138
Q16635	TAZ EFE2 G4.5	143	116
P49755	TMED10 TMP21	143	11
Q13107	USP4 UNP UNPH	143	27
P07947	YES1 YES	143	94
P19532	TFE3 BHLHE33	143	14
P34998	CRHR1 CRFR CRFR1 CRHR	142	13
P10909	CLU APOJ CLI KUB1 AAG4	142	153
P05455	SSB	142	98
P01286	GHRH GHRF	142	6
Q01826	SATB1	142	98
Q05329	GAD2 GAD65	142	55
Q8N608	DPP10 DPRP3 KIAA1492	142	16
P01011	SERPINA3 AACT GIG24 GIG25	142	175
O15409	FOXP2 CAGH44 TNRC10	142	30
P60510	PPP4C PPP4 PPX	142	21
Q13077	TRAF1 EBI6	142	59
Q03518	TAP1 ABCB2 PSF1 RING4 Y3	142	68
O75604	USP2 UBP41	142	7
Q96LA8	PRMT6 HRMT1L6	141	38
O95994	AGR2 AG2 UNQ515/PRO1030	141	149
Q13509	TUBB3 TUBB4	141	212
P17612	PRKACA PKACA	141	87
Q9NXA8	SIRT5 SIR2L5	141	44
P16104	H2AX H2AFX	141	72
Q9HC62	SENP2 KIAA1331	141	36
P45880	VDAC2	141	20
P99999	CYCS CYC	140	219
P19022	CDH2 CDHN NCAD	140	193
P09543	CNP	140	92
O15534	PER1 KIAA0482 PER RIGUI	140	20
Q9UD71	PPP1R1B DARPP32	140	46
P07602	PSAP GLBA SAP1	140	109
Q9Y6W8	ICOS AILIM	140	723
P15884	TCF4 BHLHB19 ITF2 SEF2	140	90
P47211	GALR1 GALNR GALNR1	140	2
P12259	F5	140	1819
P08842	STS ARSC1	140	80
Q13207	TBX2	140	43
O00220	TNFRSF10A APO2 DR4 TRAILR1	140	133
Q9P2Y5	UVRAG	140	27
Q9UNS1	TIMELESS TIM TIM1 TIMELESS1	140	16
Q99956	DUSP9 MKP4	139	32
P55008	AIF1 G1 IBA1	139	71
P51168	SCNN1B	139	9
Q16143	SNCB	139	62
P09488	GSTM1 GST1	139	58
O43603	GALR2 GALNR2	139	2
Q16548	BCL2A1 BCL2L5 BFL1 GRS HBPA1	139	22
Q92988	DLX4 BP1 DLX7 DLX8 DLX9	139	44
P08172	CHRM2	139	47
Q8WXE1	ATRIP AGS1	139	24
Q86YM7	HOMER1 SYN47	139	76
P06727	APOA4	139	59
P55916	UCP3 SLC25A9	139	10
Q9Y6I4	USP3	139	27
Q9UKW4	VAV3	139	31
Q8NEB9	PIK3C3 VPS34	139	11
O75907	DGAT1 AGRP1 DGAT	138	4
P19338	NCL	138	755
O14896	IRF6	138	37
O75197	LRP5 LR3 LRP7	138	69
P28845	HSD11B1 HSD11 HSD11L SDR26C1	138	19
P62508	ESRRG ERR3 ERRG2 KIAA0832 NR3B3	138	15
Q15116	PDCD1 PD1	138	309
P43115	PTGER3	138	19
Q13568	IRF5	138	156
Q9H334	FOXP1 HSPC215	138	126
P11388	TOP2A TOP2	138	151
Q86TM6	SYVN1 HRD1 KIAA1810	138	17
P07992	ERCC1	137	331
Q9UBS5	GABBR1 GPRC3A	137	35
P35398	RORA NR1F1 RZRA	137	33
P08631	HCK	137	92
P61626	LYZ LZM	137	81
P46060	RANGAP1 KIAA1835 SD	137	35
P08727	KRT19	137	322
P50416	CPT1A CPT1	137	25
P02765	AHSG FETUA PRO2743	137	68
P17542	TAL1 BHLHA17 SCL TCL5	137	43
P49767	VEGFC	137	51
P49336	CDK8	136	56
P35520	CBS	136	233
Q9Y4H2	IRS2	136	47
P27169	PON1 PON	136	96
Q9GZQ8	MAP1LC3B MAP1ALC3	136	48
O14625	CXCL11 ITAC SCYB11 SCYB9B	136	49
P58012	FOXL2	136	20
P11511	CYP19A1 ARO1 CYAR CYP19	136	24
P55854	SUMO3 SMT3A SMT3H1	136	46
P12830	CDH1 CDHE UVO	135	367
P49747	COMP	135	87
Q15233	NONO NRB54	135	32
P35557	GCK	135	49
P42336	PIK3CA	135	65
Q9UM07	PADI4 PAD4 PADI5 PDI5	135	34
P23511	NFYA	135	23
Q16552	IL17A CTLA8 IL17	135	291
Q12929	EPS8	135	15
P33681	CD80 CD28LG CD28LG1 LAB7	135	1739
P14316	IRF2	135	73
Q02641	CACNB1 CACNLB1	135	57
O15520	FGF10	135	22
P05177	CYP1A2	135	101
Q9H2P0	ADNP ADNP1 KIAA0784	135	40
Q13470	TNK1	135	46
Q00059	TFAM TCF6 TCF6L2	135	19
P37023	ACVRL1 ACVRLK1 ALK1	134	68
P09919	CSF3 C17orf33 GCSF	134	212
P48357	LEPR DB OBR	134	43
P32238	CCKAR CCKRA	134	2
O43684	BUB3	134	25
Q14432	PDE3A	134	28
P00973	OAS1 OIAS	134	34
P21333	FLNA FLN FLN1	134	88
Q14330	GPR18 GPCRW	134	1
P14625	HSP90B1 GRP94 TRA1	134	144
P37173	TGFBR2	134	14
P15374	UCHL3	134	46
P68036	UBE2L3 UBCE7 UBCH7	134	37
P10635	CYP2D6 CYP2DL1	133	26
P84996	GNAS GNAS1	133	31
P00742	F10	133	2101
P25929	NPY1R NPYR NPYY1	133	29
Q96BR1	SGK3 CISK SGKL	133	31
Q01959	SLC6A3 DAT1	133	20
Q96AD5	PNPLA2 ATGL FP17548	133	62
P80188	LCN2 HNL NGAL	133	152
P22455	FGFR4 JTK2 TKF	133	134
O94992	HEXIM1 CLP1 EDG1 HIS1 MAQ1	133	48
Q13546	RIPK1 RIP RIP1	133	53
O14543	SOCS3 CIS3 SSI3	133	166
Q15596	NCOA2 BHLHE75 SRC2 TIF2	133	26
P48681	NES Nbla00170	133	99
Q5JWF2	GNAS GNAS1	133	31
O95983	MBD3	133	61
P52926	HMGA2 HMGIC	133	55
Q13627	DYRK1A DYRK MNB MNBH	133	31
Q9UNA0	ADAMTS5 ADAMTS11 ADMP2	133	12
P11161	EGR2 KROX20	133	37
Q92800	EZH1 KIAA0388	133	10
P15085	CPA1 CPA	133	50
P63092	GNAS GNAS1 GSP	133	31
Q96DB2	HDAC11	133	37
P55317	FOXA1 HNF3A TCF3A	133	171
Q8IVH2	FOXP4 FKHLA	133	21
P16591	FER TYK3	133	95
Q6GPH4	XAF1 BIRC4BP XIAPAF1	133	16
P63027	VAMP2 SYB2	133	96
P13010	XRCC5 G22P2	133	258
Q06945	SOX4	133	50
Q13489	BIRC3 API2 MIHC RNF49	132	38
P08174	CD55 CR DAF	132	821
Q05315	CLC LGALS10 LGALS10A	132	20
P01732	CD8A MAL	132	2964
Q8WVC0	LEO1 RDL	132	9
Q9UDY8	MALT1 MLT	132	81
P05129	PRKCG PKCG	132	44
O43734	TRAF3IP2 C6orf2 C6orf4 C6orf5 C6orf6	132	27
Q9Y3R0	GRIP1	132	47
P20366	TAC1 NKA NKNA TAC2	132	32
Q9ULW0	TPX2 C20orf1 C20orf2 DIL2 HCA519	132	81
P61088	UBE2N BLU	132	55
P51572	BCAP31 BAP31 DXS1357E	131	72
P15121	AKR1B1 ALDR1 ALR2	131	50
Q13596	SNX1	131	46
P15153	RAC2	131	36
P31151	S100A7 PSOR1 S100A7C	131	153
Q14209	E2F2	131	108
Q9NZ52	GGA3 KIAA0154	131	16
P18146	EGR1 KROX24 ZNF225	131	143
Q02790	FKBP4 FKBP52	131	99
O43683	BUB1 BUB1L	130	112
P00915	CA1	130	94
P62258	YWHAE	130	58
P21709	EPHA1 EPH EPHT EPHT1	130	56
Q8TAK6	OLIG1 BHLHB6 BHLHE21	130	74
Q06587	RING1 RNF1	130	96
O75874	IDH1 PICD	130	66
P06732	CKM CKMM	130	110
Q8IZU3	SYCP3 SCP3	130	16
O15350	TP73 P73	130	135
P01185	AVP ARVP VP	130	48
Q9P286	PAK5 KIAA1264 PAK7	130	2
Q9HD26	GOPC CAL FIG	130	13
P07203	GPX1	130	87
O15360	FANCA FAA FACA FANCH	130	48
P29320	EPHA3 ETK ETK1 HEK TYRO4	130	69
Q13324	CRHR2 CRF2R CRH2R	130	3
P01034	CST3	130	223
Q9P0U3	SENP1	130	19
P78560	CRADD RAIDD	129	43
P24844	MYL9 MLC2 MRLC1 MYRL2	129	33
Q13724	MOGS GCS1	129	69
P07492	GRP	129	106
P10276	RARA NR1B1	129	132
Q9NRA0	SPHK2 SK2	129	7
Q9Y275	TNFSF13B BAFF BLYS TALL1 TNFSF20 ZTNF4 UNQ401/PRO738	129	231
Q96J94	PIWIL1 HIWI	129	10
Q07869	PPARA NR1C1 PPAR	129	49
P21359	NF1	129	73
P04181	OAT	129	31
P61289	PSME3	129	11
Q16653	MOG	129	71
P14859	POU2F1 OCT1 OTF1	129	37
Q13972	RASGRF1 CDC25 GNRP GRF1	129	11
P30101	PDIA3 ERP57 ERP60 GRP58	129	44
P15428	HPGD PGDH1 SDR36C1	129	52
O60760	HPGDS GSTS PGDS PTGDS2	129	52
Q9UBP4	DKK3 REIC UNQ258/PRO295	129	35
P10070	GLI2 THP	129	6
O43543	XRCC2	129	51
Q9BPZ7	MAPKAP1 MIP1 SIN1	129	7
P52788	SMS	129	219
O00175	CCL24 MPIF2 SCYA24	128	54
P80075	CCL8 MCP2 SCYA10 SCYA8	128	37
P24592	IGFBP6 IBP6	128	61
O15105	SMAD7 MADH7 MADH8	128	138
Q9UIS9	MBD1 CXXC3 PCM1	128	109
P40938	RFC3	128	33
P20393	NR1D1 EAR1 HREV THRAL	128	139
P0C0L5	C4B CO4 CPAMD3; C4B_2	128	176
Q9UHI8	ADAMTS1 KIAA1346 METH1	128	38
Q16828	DUSP6 MKP3 PYST1	128	58
O14964	HGS HRS	128	77
Q9BYX4	IFIH1 MDA5 RH116	128	19
P27540	ARNT BHLHE2	128	133
P05113	IL5	128	200
P07148	FABP1 FABPL	128	174
O60825	PFKFB2	128	7
O75460	ERN1 IRE1	128	89
Q9H0Y0	ATG10 APG10L PP12616	128	17
Q9HCE7	SMURF1 KIAA1625	128	38
P35590	TIE1 TIE	128	108
P35236	PTPN7	128	31
P35916	FLT4 VEGFR3	128	141
Q92560	BAP1 KIAA0272 hucep-6	127	107
O60716	CTNND1 KIAA0384	127	104
P61221	ABCE1 RLI RNASEL1 RNASELI RNS4I OK/SW-cl.40	127	6
P30153	PPP2R1A	127	47
P15289	ARSA	127	12
P34130	NTF4 NTF5	127	70
O00151	PDLIM1 CLIM1 CLP36	127	33
O43502	RAD51C RAD51L2	127	84
Q08116	RGS1 1R20 BL34 IER1	127	3
P07900	HSP90AA1 HSP90A HSPC1 HSPCA	127	175
Q9H8V3	ECT2	127	5
Q00597	FANCC FAC FACC	127	59
P32519	ELF1	127	25
Q05193	DNM1 DNM	127	79
P12270	TPR	127	39
Q15465	SHH	127	109
Q9Y2K6	USP20 KIAA1003 LSFR3A VDU2	127	17
O00459	PIK3R2	127	57
Q13263	TRIM28 KAP1 RNF96 TIF1B	127	115
Q15637	SF1 ZFM1 ZNF162	127	133
P78325	ADAM8 MS2	126	24
Q13617	CUL2	126	14
Q9NP61	ARFGAP3 ARFGAP1	126	4
P17787	CHRNB2	126	12
P53701	HCCS CCHL	126	20
Q08209	PPP3CA CALNA CNA	126	53
P16144	ITGB4	126	179
Q8N488	RYBP DEDAF YEAF1	126	25
Q9HCR9	PDE11A	126	2
Q03181	PPARD NR1C2 PPARB	126	51
Q14814	MEF2D	126	65
P36969	GPX4	126	58
P41180	CASR GPRC2A PCAR1	126	32
O75626	PRDM1 BLIMP1	126	130
P17752	TPH1 TPH TPRH TRPH	126	36
O14508	SOCS2 CIS2 SSI2 STATI2	126	30
P21854	CD72	125	444
Q99728	BARD1	125	39
Q8TDX7	NEK7	125	22
Q96J02	ITCH	125	48
P00797	REN	125	119
P04085	PDGFA PDGF1	125	16
P11279	LAMP1	125	413
P55058	PLTP	125	40
P49146	NPY2R	125	8
P15172	MYOD1 BHLHC1 MYF3 MYOD	125	188
Q9NQC3	RTN4 KIAA0886 NOGO My043 SP1507	125	14
P02655	APOC2 APC2	125	14
P34810	CD68	125	930
P43146	DCC IGDCC1	125	64
P20248	CCNA2 CCN1 CCNA	125	125
O95239	KIF4A KIF4	125	7
P10144	GZMB CGL1 CSPB CTLA1 GRB	125	234
P14416	DRD2	125	30
O75582	RPS6KA5 MSK1	125	58
Q9C0B1	FTO KIAA1752	125	54
Q14683	SMC1A DXS423E KIAA0178 SB1.8 SMC1 SMC1L1	125	84
Q9NQB0	TCF7L2 TCF4	125	125
Q01973	ROR1 NTRKR1	125	123
P02461	COL3A1	124	77
P31946	YWHAB	124	98
Q9Y478	PRKAB1 AMPK	124	63
P35670	ATP7B PWD WC1 WND	124	97
O75473	LGR5 GPR49 GPR67	124	160
Q9Y5N1	HRH3 GPCR97	124	20
Q9Y2K2	SIK3 KIAA0999 QSK L19	124	0
P09564	CD7	124	1127
Q9NS28	RGS18 RGS13	124	18
P07585	DCN SLRR1B	124	129
P21912	SDHB SDH SDH1	124	34
Q05469	LIPE	124	20
O60936	NOL3 ARC NOP	124	7
Q99572	P2RX7	124	23
P08697	SERPINF2 AAP PLI	124	92
Q14213	EBI3 IL27B	124	89
Q13202	DUSP8 C11orf81 VH5	124	4
P19235	EPOR	124	70
Q9UNN5	FAF1 UBXD12 UBXN3A CGI-03	124	51
Q76LX8	ADAMTS13 C9orf8 UNQ6102/PRO20085	124	73
Q96SB4	SRPK1	124	113
Q16352	INA NEF5	123	255
O95832	CLDN1 CLD1 SEMP1 UNQ481/PRO944	123	47
O00499	BIN1 AMPHL	123	94
Q15291	RBBP5 RBQ3	123	6
Q9Y6R1	SLC4A4 NBC NBC1 NBCE1	123	20
O95863	SNAI1 SNAH	123	55
P51878	CASP5 ICH3	123	17
P48547	KCNC1	123	16
Q13586	STIM1 GOK	123	99
Q92542	NCSTN KIAA0253 UNQ1874/PRO4317	123	52
Q14643	ITPR1 INSP3R1	123	29
P34932	HSPA4 APG2	123	70
Q9HBE5	IL21R NILR UNQ3121/PRO10273	123	34
P41594	GRM5 GPRC1E MGLUR5	123	35
P46089	GPR3 ACCA	123	41
Q9Y6W6	DUSP10 MKP5	123	7
P78556	CCL20 LARC MIP3A SCYA20	123	81
P31948	STIP1	123	95
P40225	THPO MGDF	123	40
P02766	TTR PALB	123	90
Q16822	PCK2 PEPCK2	123	29
P04271	S100B	123	205
P19876	CXCL3 GRO3 GROG SCYB3	122	8
P17544	ATF7 ATFA	122	9
O95816	BAG2	122	50
O14786	NRP1 NRP VEGF165R	122	61
Q969S8	HDAC10	122	83
Q13562	NEUROD1 BHLHA3 NEUROD	122	84
P17858	PFKL	122	26
Q9NP56	PDE7B	122	3
Q9H3D4	TP63 KET P63 P73H P73L TP73L	122	136
O15055	PER2 KIAA0347	122	37
Q8IU85	CAMK1D CAMKID	122	38
Q9H1A4	ANAPC1 TSG24	122	2
P17174	GOT1	122	18
P14209	CD99 MIC2 MIC2X MIC2Y	122	682
Q12834	CDC20	122	36
P05161	ISG15 G1P2 UCRP	122	114
P42685	FRK PTK5 RAK	122	85
Q9UJX2	CDC23 ANAPC8	122	13
O15197	EPHB6	122	91
P02654	APOC1	122	36
O00626	CCL22 MDC SCYA22 A-152E5.1	122	60
Q01974	ROR2 NTRKR2	122	90
P01222	TSHB	122	166
P42684	ABL2 ABLL ARG	121	120
O00299	CLIC1 G6 NCC27	121	89
Q9Y5C1	ANGPTL3 ANGPT5 UNQ153/PRO179	121	113
P05413	FABP3 FABP11 MDGI	121	206
P02545	LMNA LMN1	121	166
Q96ST3	SIN3A	121	20
Q96DY7	MTBP	121	23
Q07343	PDE4B DPDE4	121	22
Q99496	RNF2 BAP1 DING HIPI3 RING1B	121	102
Q9NRD5	PICK1 PRKCABP	121	71
P51398	DAP3 MRPS29	121	48
Q7Z434	MAVS IPS1 KIAA1271 VISA	121	32
P28360	MSX1 HOX7	121	50
Q01650	SLC7A5 CD98LC LAT1 MPE16	121	25
P16422	EPCAM GA733-2 M1S2 M4S1 MIC18 TACSTD1 TROP1	121	971
Q9UKG1	APPL1 APPL DIP13A KIAA1428	121	15
P31371	FGF9	121	27
P28562	DUSP1 CL100 MKP1 PTPN10 VH1	121	28
P17813	ENG END	121	375
P02775	PPBP CTAP3 CXCL7 SCYB7 TGB1 THBGB1	121	63
Q9Y566	SHANK1	121	109
P09603	CSF1	120	109
Q04656	ATP7A MC1 MNK	120	38
Q8IZP0	ABI1 SSH3BP1	120	18
P06850	CRH	120	54
P20138	CD33 SIGLEC3	120	1294
Q96GD4	AURKB AIK2 AIM1 AIRK2 ARK2 STK1 STK12 STK5	120	117
O95800	GPR75	120	6
O00170	AIP XAP2	120	36
P22352	GPX3 GPXP	120	32
O76074	PDE5A PDE5	120	23
P12755	SKI	120	50
Q06830	PRDX1 PAGA PAGB TDPX2	120	126
P22692	IGFBP4 IBP4	120	43
P14384	CPM	120	16
P14672	SLC2A4 GLUT4	120	82
P10588	NR2F6 EAR2 ERBAL2	120	20
Q9GZR1	SENP6 KIAA0797 SSP1 SUSP1 FKSG6	120	30
P25103	TACR1 NK1R TAC1R	120	19
P23786	CPT2 CPT1	120	35
Q07325	CXCL9 CMK MIG SCYB9	120	89
P52566	ARHGDIB GDIA2 GDID4 RAP1GN1	120	78
P46013	MKI67	120	241
P08620	FGF4 HST HSTF1 KS3	120	23
P54756	EPHA5 BSK EHK1 HEK7 TYRO4	120	76
P68400	CSNK2A1 CK2A1	120	88
P78324	SIRPA BIT MFR MYD1 PTPNS1 SHPS1 SIRP	120	202
Q86XR7	TICAM2 TIRAP3 TIRP TRAM	120	7
Q93097	WNT2B WNT13	120	9
Q14134	TRIM29 ATDC	120	15
Q8TD43	TRPM4 LTRPC4	120	36
P08294	SOD3	120	88
Q96BI3	APH1A PSF CGI-78 UNQ579/PRO1141	120	3
P34969	HTR7	119	5
P13612	ITGA4 CD49D	119	577
Q14164	IKBKE IKKE IKKI KIAA0151	119	94
P35813	PPM1A PPPM1A	119	82
Q92994	BRF1 BRF GTF3B TAF3B2 TAF3C	119	33
Q03933	HSF2 HSTF2	119	159
Q13285	NR5A1 AD4BP FTZF1 SF1	119	15
Q15743	GPR68 OGR1	119	7
P31645	SLC6A4 HTT SERT	119	37
Q16875	PFKFB3	119	15
P51114	FXR1	119	64
Q01844	EWSR1 EWS	119	69
Q9UKL3	CASP8AP2 FLASH KIAA1315 RIP25	119	4
P21580	TNFAIP3 OTUD7C	119	60
Q16572	SLC18A3 VACHT	119	8
Q05086	UBE3A E6AP EPVE6AP HPVE6A	119	50
O15198	SMAD9 MADH6 MADH9 SMAD8	119	39
P01111	NRAS HRAS1	119	52
Q13075	NAIP BIRC1	118	6
P12645	BMP3 BMP3A	118	12
P08473	MME EPN	118	477
O00330	PDHX PDX1	118	3
Q9UKX7	NUP50 NPAP60L PRO1146	118	21
P03973	SLPI WAP4 WFDC4	118	61
O60343	TBC1D4 AS160 KIAA0603	118	23
P08758	ANXA5 ANX5 ENX2 PP4	118	68
P34972	CNR2 CB2A CB2B	118	18
Q14116	IL18 IGIF IL1F4	118	125
P17540	CKMT2	118	8
Q8N7H5	PAF1 PD2	118	6
Q29983	MICA PERB11.1	118	260
Q96BK5	PINX1 LPTL LPTS	118	8
P17931	LGALS3 MAC2	118	186
O00255	MEN1 SCG2	118	23
O75084	FZD7	118	21
P49327	FASN FAS	118	110
P24530	EDNRB ETRB	118	8
P18065	IGFBP2 BP2 IBP2	118	84
Q9H211	CDT1	118	20
P33076	CIITA MHC2TA	118	14
P04062	GBA GC GLUC	118	77
Q8WYQ5	DGCR8 C22orf12 DGCRK6 LP4941	118	28
Q9BZW8	CD244 2B4	118	354
P78545	ELF3 ERT ESX JEN	118	89
Q9UL62	TRPC5 TRP5	118	63
Q15654	TRIP6 OIP1	118	52
P02776	PF4 CXCL4 SCYB4	118	83
Q9H1D0	TRPV6 ECAC2	118	1
O95954	FTCD	117	71
Q96IZ0	PAWR PAR4	117	31
Q14451	GRB7	117	48
P04180	LCAT	117	34
P61201	COPS2 CSN2 TRIP15	117	22
Q9BS40	LXN	117	25
Q14003	KCNC3	117	35
P33316	DUT	117	33
P15260	IFNGR1	117	159
P18505	GABRB1	117	16
O43823	AKAP8 AKAP95	117	46
O75390	CS	117	746
Q9Y294	ASF1A CGI-98 HSPC146	117	30
Q9NPI6	DCP1A SMIF	117	58
P41221	WNT5A	117	68
P37275	ZEB1 AREB6 TCF8	117	55
P63279	UBE2I UBC9 UBCE9	117	43
Q969Q1	TRIM63 IRF MURF1 RNF28 SMRZ	117	22
P13073	COX4I1 COX4	116	37
P33151	CDH5	116	124
Q9NQI0	DDX4 VASA	116	38
O95817	BAG3 BIS	116	40
Q9BY84	DUSP16 KIAA1700 MKP7	116	12
O95760	IL33 C9orf26 IL1F11 NFHEV	116	108
P49450	CENPA	116	86
P49427	CDC34 UBCH3 UBE2R1	116	65
P41219	PRPH NEF4 PRPH1	116	75
P18669	PGAM1 PGAMA CDABP0006	116	50
P28331	NDUFS1	116	9
O14921	RGS13	116	20
P56159	GFRA1 GDNFRA RETL1 TRNR1	116	46
P23759	PAX7 HUP1	116	159
Q9Y337	KLK5 SCTE UNQ570/PRO1132	116	11
O43623	SNAI2 SLUG SLUGH	116	112
Q01538	MYT1 KIAA0835 KIAA1050 MTF1 MYTI PLPB1	116	30
O43660	PLRG1	116	9
O15146	MUSK	116	83
Q15131	CDK10	116	5
Q8WU20	FRS2	116	38
O15540	FABP7 BLBP FABPB MRG	116	63
P36402	TCF7 TCF1	116	83
Q8TEY7	USP33 KIAA1097 VDU1	116	33
P30040	ERP29 C12orf8 ERP28	116	21
P28907	CD38	115	2005
Q13444	ADAM15 MDC15	115	49
O00767	SCD	115	49
P22003	BMP5	115	132
P11229	CHRM1	115	4
O95996	APC2 APCL	115	15
Q9BX63	BRIP1 BACH1 FANCJ	115	61
Q12931	TRAP1 HSP75	115	159
P30041	PRDX6 AOP2 KIAA0106	115	116
P11233	RALA RAL	115	47
P01116	KRAS KRAS2 RASK2	115	106
P61278	SST	115	35
Q13393	PLD1	115	42
Q9Y618	NCOR2 CTG26	115	48
Q02363	ID2 BHLHB26	115	151
Q9H0H5	RACGAP1 KIAA1478 MGCRACGAP	115	43
P29460	IL12B NKSF2	115	253
Q9NR23	GDF3 UNQ222/PRO248	115	51
P27487	DPP4 ADCP2 CD26	115	327
P24593	IGFBP5 IBP5	115	30
P42772	CDKN2B MTS2	115	91
P49765	VEGFB VRF	115	54
O43463	SUV39H1 KMT1A SUV39H	115	66
Q9NTJ3	SMC4 CAPC SMC4L1	115	7
O00161	SNAP23	115	29
P54578	USP14 TGT	115	49
P45844	ABCG1 ABC8 WHT1	114	57
Q674R7	ATG9B APG9L2 NOS3AS	114	2
Q13443	ADAM9 KIAA0021 MCMP MDC9 MLTNG	114	56
P41182	BCL6 BCL5 LAZ3 ZBTB27 ZNF51	114	144
Q8TB72	PUM2 KIAA0235 PUMH2	114	85
Q12923	PTPN13 PNP1 PTP1E PTPL1	114	9
Q13635	PTCH1 PTCH	114	50
P53794	SLC5A3	114	8
P67775	PPP2CA	114	65
Q13188	STK3 KRS1 MST2	114	77
A5PKW4	PSD EFA6 EFA6A KIAA2011 PSD1 TYL	114	181
Q14469	HES1 BHLHB39 HL HRY	114	148
Q14145	KEAP1 INRF2 KIAA0132 KLHL19	114	39
P0DMV8	HSPA1A HSP72 HSPA1 HSX70	114	150
O14908	GIPC1 C19orf3 GIPC RGS19IP1	114	3
P47900	P2RY1	114	11
Q96PX8	SLITRK1 KIAA1910 LRRC12 UNQ233/PRO266	114	9
Q16623	STX1A STX1	114	72
O00570	SOX1	114	40
Q9BWD1	ACAT2 ACTL	114	85
Q9UBT2	UBA2 SAE2 UBLE1B HRIHFB2115	114	21
Q99835	SMO SMOH	114	112
Q9Y5B9	SUPT16H FACT140 FACTP140	114	93
O00327	ARNTL BHLHE5 BMAL1 MOP3 PASD3	114	43
P13497	BMP1 PCOLC	113	6
P13945	ADRB3 ADRB3R B3AR	113	2
P26842	CD27 TNFRSF7	113	1311
P30838	ALDH3A1 ALDH3	113	44
Q8NHW3	MAFA	113	122
P43121	MCAM MUC18	113	256
Q14847	LASP1 MLN50	113	27
Q12888	TP53BP1	113	25
Q9Y6E7	SIRT4 SIR2L4	113	22
Q12824	SMARCB1 BAF47 INI1 SNF5L1	113	100
P54727	RAD23B	113	52
O00198	HRK BID3	113	5
Q969Q5	RAB24	113	18
O75364	PITX3 PTX3	113	19
P29373	CRABP2	113	72
Q969K3	RNF34	113	2
Q9UBU2	DKK2 UNQ682/PRO1316	113	18
Q06787	FMR1	113	90
P38117	ETFB FP585	113	4
Q9UJW3	DNMT3L	113	54
Q9UMR2	DDX19B DBP5 DDX19 TDBP	113	2
Q8IWU9	TPH2 NTPH	113	14
Q9H2G2	SLK KIAA0204 STK2	113	31
P48995	TRPC1 TRP1	113	32
O15164	TRIM24 RNF82 TIF1 TIF1A	113	39
P0DML2	CSH1	112	26
Q7L591	DOK3	112	5
P16860	NPPB	112	309
Q92523	CPT1B KIAA1670	112	8
Q9NRM7	LATS2 KPM	112	29
P07197	NEFM NEF3 NFM	112	152
P20719	HOXA5 HOX1C	112	156
Q9H4L4	SENP3 SSP3 SUSP3	112	15
P30872	SSTR1	112	21
P14923	JUP CTNNG DP3	112	67
P12268	IMPDH2 IMPD2	112	37
P11217	PYGM	112	38
Q05209	PTPN12	112	25
P19793	RXRA NR2B1	112	86
P08559	PDHA1 PHE1A	112	27
Q12841	FSTL1 FRP	112	18
P31152	MAPK4 ERK4 PRKM4	112	25
Q13164	MAPK7 BMK1 ERK5 PRKM7	112	49
O15503	INSIG1	112	1
P09958	FURIN FUR PACE PCSK3	112	48
Q99958	FOXC2 FKHL14 MFH1	112	128
P21918	DRD5 DRD1B DRD1L2	112	24
P00367	GLUD1 GLUD	112	27
P00488	F13A1 F13A	112	122
Q02763	TEK TIE2 VMCM VMCM1	112	314
Q9NQ88	TIGAR C12orf5	112	24
O95150	TNFSF15 TL1 VEGI	112	34
O75934	BCAS2 DAM1	112	50
Q15853	USF2 BHLHB12	112	79
Q7Z4N2	TRPM1 LTRPC1 MLSN MLSN1	112	0
Q15059	BRD3 KIAA0043 RING3L	111	97
P30519	HMOX2 HO2	111	40
Q99714	HSD17B10 ERAB HADH2 MRPP2 SCHAD SDR5C1 XH98G2	111	45
P24386	CHM REP1 TCD	111	9
P62491	RAB11A RAB11	111	74
O43639	NCK2 GRB4	111	20
P40925	MDH1 MDHA	111	57
P07864	LDHC LDH3 LDHX	111	26
P56178	DLX5	111	112
P27707	DCK	111	96
P02458	COL2A1	111	66
P34947	GRK5 GPRK5	111	70
O00305	CACNB4 CACNLB4	111	33
Q9NSA1	FGF21 UNQ3115/PRO10196	111	124
Q14738	PPP2R5D	111	43
Q8WXF8	DEDD2 FLAME3 PSEC0004	111	1
P51784	USP11 UHX1	111	23
Q9H5I1	SUV39H2 KMT1B	111	9
P36897	TGFBR1 ALK5 SKR4	111	18
Q7L7X3	TAOK1 KIAA1361 MAP3K16 MARKK	111	29
P41220	RGS2 G0S8 GIG31	111	29
P54253	ATXN1 ATX1 SCA1	110	19
P84077	ARF1	110	125
Q9H257	CARD9	110	12
Q9NVM4	PRMT7 KIAA1933	110	14
P24347	MMP11 STMY3	110	98
Q9NRG4	SMYD2 KMT3C	110	11
P09382	LGALS1	110	62
P16435	POR CYPOR	110	633
Q9NS91	RAD18 RNF73	110	80
P28749	RBL1	110	32
P35249	RFC4	110	58
Q9BY11	PACSIN1 KIAA1379	110	8
P38646	HSPA9 GRP75 HSPA9B mt-HSP70	110	80
P16520	GNB3	110	26
P83916	CBX1 CBX	110	52
O75461	E2F6	110	75
Q13616	CUL1	110	57
P01350	GAST GAS	110	16
O60427	FADS1 FADSD5	110	45
Q9UH65	SWAP70 KIAA0640 HSPC321	110	45
P28370	SMARCA1 SNF2L SNF2L1	110	10
Q14191	WRN RECQ3 RECQL2	110	64
Q9NUX5	POT1	110	9
Q7Z444	ERAS HRAS2 HRASP	110	11
Q02447	SP3	110	196
Q12951	FOXI1 FKHL10 FREAC6	110	20
P16152	CBR1 CBR CRN SDR21C1	109	44
Q9H221	ABCG8	109	3
Q9GZX7	AICDA AID	109	99
P00736	C1R	109	10
P11245	NAT2 AAC2	109	18
Q02252	ALDH6A1 MMSDH	109	22
Q92585	MAML1 KIAA0200	109	3
P78395	PRAME MAPE OIP4	109	11
O60880	SH2D1A DSHP SAP	109	53
P48443	RXRG NR2B3	109	53
O60678	PRMT3 HRMT1L3	109	47
Q9Y6Q9	NCOA3 AIB1 BHLHE42 RAC3 TRAM1	109	95
Q15119	PDK2 PDHK2	109	107
Q13308	PTK7 CCK4	109	102
P27815	PDE4A DPDE2	109	60
P41145	OPRK1 OPRK	109	6
P48736	PIK3CG	109	61
Q9UH92	MLX BHLHD13 TCFL4	109	15
Q14674	ESPL1 ESP1 KIAA0165	109	53
Q03426	MVK	109	31
P35638	DDIT3 CHOP CHOP10 GADD153	109	68
Q16627	CCL14 NCC2 SCYA14	109	48
P25101	EDNRA ETA ETRA	109	14
P26196	DDX6 HLR2 RCK	109	44
Q13042	CDC16 ANAPC6	109	8
P21397	MAOA	109	16
Q9Y696	CLIC4	109	23
P0DPQ6	DDIT3	109	68
Q16829	DUSP7 PYST2	109	4
Q00341	HDLBP HBP VGL	109	28
Q96T60	PNKP	109	9
Q9NZC2	TREM2	109	71
Q9UBQ0	VPS29 DC15 DC7 MDS007	109	3
Q9UNG2	TNFSF18 AITRL GITRL TL6 UNQ149/PRO175	109	100
Q9UL17	TBX21 TBET TBLYM	109	146
P55327	TPD52	109	23
P35716	SOX11	109	19
P05937	CALB1 CAB27	109	66
O94760	DDAH1 DDAH	108	15
P43681	CHRNA4 NACRA4	108	23
P50461	CSRP3 CLP MLP	108	26
Q99424	ACOX2	108	33
P31146	CORO1A CORO1	108	45
Q15672	TWIST1 BHLHA38 TWIST	108	124
P09455	RBP1 CRBP1	108	42
P17096	HMGA1 HMGIY	108	18
Q96MS0	ROBO3	108	18
Q9BQG0	MYBBP1A P160	108	12
P12036	NEFH KIAA0845 NFH	108	258
Q92904	DAZL DAZH DAZL1 DAZLA SPGYLA	108	20
Q9UHL9	GTF2IRD1 CREAM1 GTF3 MUSTRD1 RBAP2 WBSCR11 WBSCR12	108	42
P01871	IGHM	108	37
Q9NP66	HMG20A HMGX1 HMGXB1	108	32
P21462	FPR1	108	25
P53539	FOSB G0S3	108	62
P04083	ANXA1 ANX1 LPC1	108	59
Q15375	EPHA7 EHK3 HEK11	108	57
O00300	TNFRSF11B OCIF OPG	108	111
P34925	RYK JTK5A	108	41
O43508	TNFSF12 APO3L DR3LG UNQ181/PRO207	108	67
P05091	ALDH2 ALDM	107	105
Q6P1M3	LLGL2	107	31
P80370	DLK1 DLK	107	38
P36956	SREBF1 BHLHD1 SREBP1	107	66
O95140	MFN2 CPRP1 KIAA0214	107	87
Q96L34	MARK4 KIAA1860 MARKL1	107	4
Q9H239	MMP28 MMP25 UNQ1893/PRO4339	107	44
O14974	PPP1R12A MBS MYPT1	107	26
Q9UGN5	PARP2 ADPRT2 ADPRTL2	107	8
O43613	HCRTR1	107	3
O15151	MDM4 MDMX	107	54
Q15648	MED1 ARC205 CRSP1 CRSP200 DRIP205 DRIP230 PBP PPARBP PPARGBP RB18A TRAP220 TRIP2	107	29
Q02156	PRKCE PKCE	107	77
Q9UKS6	PACSIN3	107	38
Q9UPY3	DICER1 DICER HERNA KIAA0928	107	55
Q96D42	HAVCR1 KIM1 TIM1 TIMD1	107	99
Q13002	GRIK2 GLUR6	107	14
P10071	GLI3	107	30
P42081	CD86 CD28LG2	107	2127
Q86TI2	DPP9 DPRP2	107	32
P56180	TPTE	107	11
O00762	UBE2C UBCH10	107	71
P00750	PLAT	107	75
P33981	TTK MPS1 MPS1L1	107	65
P30518	AVPR2 ADHR DIR DIR3 V2R	107	1
P18031	PTPN1 PTP1B	107	129
P24468	NR2F2 ARP1 TFCOUP2	106	48
Q8N302	AGGF1 GPATC7 GPATCH7 VG5Q	106	3
O43194	GPR39	106	3
Q8TCT0	CERK KIAA1646	106	4
P21917	DRD4	106	8
O00253	AGRP AGRT ART	106	17
Q13043	STK4 KRS2 MST1	106	71
Q5UIP0	RIF1	106	3
Q15020	SART3 KIAA0156 TIP110	106	3
P49758	RGS6	106	5
P49763	PGF PGFL PLGF	106	66
O15554	KCNN4 IK1 IKCA1 KCA4 SK4	106	7
Q8IVT5	KSR1 KSR	106	69
Q9ULZ9	MMP17 MT4MMP	106	20
Q9Y6M1	IGF2BP2 IMP2 VICKZ2	106	89
P09681	GIP	106	51
P01148	GNRH1 GNRH GRH LHRH	106	77
O14798	TNFRSF10C DCR1 LIT TRAILR3 TRID UNQ321/PRO366	106	104
O14836	TNFRSF13B TACI	106	69
Q96RU7	TRIB3 C20orf97 NIPK SKIP3 TRB3	106	110
Q02880	TOP2B	106	10
O75469	NR1I2 PXR	106	14
P29122	PCSK6 PACE4	106	20
O75365	PTP4A3 PRL3	106	13
P11597	CETP	105	31
Q9UN19	DAPP1 BAM32 HSPC066	105	21
Q07021	C1QBP GC1QBP HABP1 SF2P32	105	77
P20645	M6PR MPR46 MPRD	105	27
P12277	CKB CKBB	105	93
O00629	KPNA4 QIP1	105	17
Q08752	PPID CYP40 CYPD	105	15
O60894	RAMP1	105	21
Q96P20	NLRP3 C1orf7 CIAS1 NALP3 PYPAF1	105	72
Q12946	FOXF1 FKHL5 FREAC1	105	20
P07237	P4HB ERBA2L PDI PDIA1 PO4DB	105	73
P06702	S100A9 CAGB CFAG MRP14	105	250
P51955	NEK2 NEK2A NLK1	105	124
Q16512	PKN1 PAK1 PKN PRK1 PRKCL1	105	53
Q8IWA4	MFN1	105	46
Q12809	KCNH2 ERG ERG1 HERG	105	2
Q14654	KCNJ11	105	7
P48506	GCLC GLCL GLCLC	105	39
P54753	EPHB3 ETK2 HEK2 TYRO6	105	120
P02794	FTH1 FTH FTHL6 OK/SW-cl.84 PIG15	105	50
Q9UNI6	DUSP12	105	23
Q9ULV1	FZD4	105	30
O00139	KIF2A KIF2 KNS2	105	22
Q00526	CDK3 CDKN3	105	35
O60741	HCN1 BCNG1	105	78
Q01167	FOXK2 ILF ILF1	105	4
P18847	ATF3	105	92
P23141	CES1 CES2 SES1	105	32
P22362	CCL1 SCYA1	105	39
P43487	RANBP1	105	14
P41222	PTGDS PDS	105	5
P07911	UMOD	105	33
P29274	ADORA2A ADORA2	104	22
Q9NRA8	EIF4ENIF1	104	26
Q8N5Z0	AADAT KAT2	104	2
Q15172	PPP2R5A	104	8
P06276	BCHE CHE1	104	35
Q9BX66	SORBS1 KIAA0894 KIAA1296 SH3D5	104	2
O15539	RGS5	104	29
Q9NZ42	PSENEN PEN2 MDS033	104	14
Q8TBE9	NANP C20orf147 HDHD4	104	20
P27701	CD82 KAI1 SAR2 ST6 TSPAN27	104	204
P05155	SERPING1 C1IN C1NH	104	92
Q99623	PHB2 BAP REA	104	20
Q13216	ERCC8 CKN1 CSA	104	42
P32119	PRDX2 NKEFB TDPX1	104	98
O75159	SOCS5 CIS6 CISH5 CISH6 KIAA0671	104	26
P22079	LPO SAPX	104	3
Q9P1W9	PIM2	104	68
Q06323	PSME1 IFI5111	104	15
Q16790	CA9 G250 MN	104	73
O00571	DDX3X DBX DDX3	104	18
P49771	FLT3LG	104	39
Q9H0R8	GABARAPL1 GEC1	104	6
Q14527	HLTF HIP116A RNF80 SMARCA3 SNF2L3 ZBU1	104	3
P07355	ANXA2 ANX2 ANX2L4 CAL1H LPC2D	104	58
P08908	HTR1A ADRB2RL1 ADRBRL1	104	1
Q9P104	DOK5 C20orf180	104	9
Q8N6T3	ARFGAP1 ARF1GAP	104	39
P07858	CTSB CPSB	104	32
O75530	EED	104	48
O60248	SOX15 SOX12 SOX20 SOX26 SOX27	104	31
Q9NRW7	VPS45 VPS45A VPS45B	104	2
Q9BUZ4	TRAF4 CART1 MLN62 RNF83	104	50
O94813	SLIT2 SLIL3	104	27
Q9Y4E8	USP15 KIAA0529	104	30
P62877	RBX1 RNF75 ROC1	104	15
P02792	FTL	104	173
Q96BA8	CREB3L1 OASIS PSEC0238	103	7
Q9Y235	APOBEC2	103	9
P01213	PDYN	103	13
O14684	PTGES MGST1L1 MPGES1 PGES PIG12	103	17
P57058	HUNK MAKV	103	68
Q9UHX1	PUF60 FIR ROBPI SIAHBP1	103	20
Q9Y230	RUVBL2 INO80J TIP48 TIP49B CGI-46	103	35
P06703	S100A6 CACY	103	92
O60216	RAD21 HR21 KIAA0078 NXP1 SCC1	103	63
P48735	IDH2	103	63
P52789	HK2	103	95
O75791	GRAP2 GADS GRB2L GRID	103	56
P15408	FOSL2 FRA2	103	52
Q9Y2G2	CARD8 KIAA0955 NDPP1	103	16
O00451	GFRA2 GDNFRB RETL2 TRNR2	103	5
P35368	ADRA1B	103	7
P51686	CCR9 GPR28	103	291
Q13618	CUL3 KIAA0617	103	52
P80365	HSD11B2 HSD11K SDR9C3	103	2
Q9Y4D1	DAAM1 KIAA0666	103	35
O43491	EPB41L2	103	1
Q02962	PAX2	103	68
P51449	RORC NR1F3 RORG RZRG	103	37
P35712	SOX6	103	18
Q13009	TIAM1	103	4
P47992	XCL1 LTN SCYC1	103	22
P05109	S100A8 CAGA CFAG MRP8	103	215
Q9BX69	CARD6	102	15
Q14118	DAG1	102	79
P62736	ACTA2 ACTSA ACTVS GIG46	102	140
Q13490	BIRC2 API1 MIHB RNF48	102	6
Q8WTS1	ABHD5 NCIE2 CGI-58	102	57
Q9UBL3	ASH2L ASH2L1	102	61
Q16774	GUK1 GMK GMPK	102	37
P81172	HAMP HEPC LEAP1 UNQ487/PRO1003	102	48
Q07108	CD69 CLEC2C	102	1255
Q9Y239	NOD1 CARD4	102	16
P62195	PSMC5 SUG1	102	29
Q2M3M2	SLC5A9 SGLT4	102	1
Q99748	NRTN	102	5
P05187	ALPP PLAP	102	212
O75376	NCOR1 KIAA1047	102	19
P11836	MS4A1 CD20	102	760
P32302	CXCR5 BLR1 MDR15	102	328
Q13873	BMPR2 PPH1	102	54
P09668	CTSH CPSB	102	60
Q96EP1	CHFR RNF196	102	48
O94806	PRKD3 EPK2 PRKCN	102	17
Q9H2R5	KLK15	102	7
O75319	DUSP11 PIR1	102	3
P21695	GPD1	102	23
Q02952	AKAP12 AKAP250	102	42
P15104	GLUL GLNS	102	80
P24298	GPT AAT1 GPT1	102	59
P35462	DRD3	102	10
Q13936	CACNA1C CACH2 CACN2 CACNL1A1 CCHL1A1	102	15
P02760	AMBP HCP ITIL	102	134
Q92583	CCL17 SCYA17 TARC	102	35
P24928	POLR2A POLR2	102	122
P31213	SRD5A2	102	17
P07437	TUBB TUBB5 OK/SW-cl.56	102	237
Q93045	STMN2 SCG10 SCGN10	102	110
Q9NZQ8	TRPM5 LTRPC5 MTR1	102	1
Q8NBS9	TXNDC5 TLP46 UNQ364/PRO700	102	17
P23921	RRM1 RR1	102	77
P28702	RXRB NR2B2	102	69
Q9HBY8	SGK2	102	131
P08133	ANXA6 ANX6	101	7
P35659	DEK	101	60
P30084	ECHS1	101	37
P48200	IREB2	101	17
P31949	S100A11 MLN70 S100C	101	56
Q96QB1	DLC1 ARHGAP7 KIAA1723 STARD12	101	19
P13349	MYF5 BHLHC2	101	13
P10826	RARB HAP NR1B2	101	73
P30048	PRDX3 AOP1	101	92
Q16656	NRF1	101	70
P05154	SERPINA5 PCI PLANH3 PROCI	101	33
Q16678	CYP1B1	101	27
P33897	ABCD1 ALD	101	37
Q99616	CCL13 MCP4 NCC1 SCYA13	101	59
P15407	FOSL1 FRA1	101	25
Q9H461	FZD8	101	9
P55774	CCL18 AMAC1 DCCK1 MIP4 PARC SCYA18	101	32
P55290	CDH13 CDHH	101	22
P35250	RFC2	101	16
O75886	STAM2 HBP	101	28
P54274	TERF1 PIN2 TRBF1 TRF TRF1	101	76
P0CG47	UBB	101	98
P51649	ALDH5A1 SSADH	101	21
Q99523	SORT1	101	14
Q02410	APBA1 MINT1 X11	100	4
P29372	MPG AAG ANPG MID1	100	97
Q7L0J3	SV2A KIAA0736 PSEC0174	100	7
Q9C0K7	STRADB ALS2CR2 ILPIP PRO1038	100	5
P78406	RAE1 MRNP41	100	65
Q96PU5	NEDD4L KIAA0439 NEDL3	100	25
P54725	RAD23A	100	37
O60658	PDE8A	100	16
Q9NYI0	PSD3 EFA6D EFA6R HCA67 KIAA0942	100	1
P50553	ASCL1 ASH1 BHLHA46 HASH1	100	61
P47870	GABRB2	100	5
P20916	MAG GMA	100	123
P08311	CTSG	100	28
Q92556	ELMO1 KIAA0281	100	11
Q03113	GNA12	100	3
Q9UBT3	DKK4	100	6
Q13115	DUSP4 MKP2 VH2	100	53
Q92908	GATA6	100	35
O95147	DUSP14 MKP6	100	25
Q99966	CITED1 MSG1	100	88
O00257	CBX4	100	11
P09622	DLD GCSL LAD PHE3	100	90
Q8WXI9	GATAD2B KIAA1150	100	35
P56703	WNT3 INT4	100	30
Q07011	TNFRSF9 CD137 ILA	100	219
O95365	ZBTB7A FBI1 LRF ZBTB7 ZNF857A	100	14
Q9UJT2	TSKS STK22S1 TSKS1	100	56
P62937	PPIA CYPA	100	35
O60885	BRD4 HUNK1	99	36
O43602	DCX DBCN LISX	99	47
Q9BWT7	CARD10 CARMA3	99	1
Q92974	ARHGEF2 KIAA0651 LFP40	99	14
P30542	ADORA1	99	7
Q93034	CUL5 VACM1	99	4
P52209	PGD PGDH	99	60
Q08999	RBL2 RB2	99	133
Q92804	TAF15 RBP56 TAF2N	99	29
O43316	PAX4	99	15
Q96A54	ADIPOR1 PAQR1 TESBP1A CGI-45	99	12
O95600	KLF8 BKLF3 ZNF741	99	24
P18615	NELFE RD RDBP	99	14
O60832	DKC1 NOLA4	99	8
Q16082	HSPB2	99	15
P49116	NR2C2 TAK1 TR4	99	64
P58294	PROK1 UNQ600/PRO1186	99	21
Q13133	NR1H3 LXRA	99	40
P27448	MARK3 CTAK1 EMK2	99	56
Q2M3G0	ABCB5	99	12
P00387	CYB5R3 DIA1	99	45
Q9UEF7	KL	99	72
P29033	GJB2	99	18
O15303	GRM6 GPRC1F MGLUR6	99	12
O60258	FGF17 UNQ161/PRO187	99	9
Q9BQ95	ECSIT	99	6
Q9GZT9	EGLN1 C1orf12 PNAS-118 PNAS-137	99	41
P15036	ETS2	99	14
P39086	GRIK1 GLUR5	99	6
P28335	HTR2C HTR1C	99	25
P28472	GABRB3	99	18
P01374	LTA TNFB TNFSF1	99	156
Q15047	SETDB1 ESET KIAA0067 KMT1E	99	54
P21815	IBSP BNSP	99	19
Q9H5Q4	TFB2M NS5ATP5	99	18
P12956	XRCC6 G22P1	99	139
Q01831	XPC XPCC	99	59
P56704	WNT3A	99	61
Q8WUK0	PTPMT1 MOSP PLIP PNAS-129	99	7
Q9P246	STIM2 KIAA1482	99	2
Q6V1X1	DPP8 DPRP1 MSTP097 MSTP135 MSTP141	98	14
P46098	HTR3A 5HT3R HTR3	98	4
P15514	AREG AREGB SDGF	98	23
Q9BZ11	ADAM33 C20orf153 UNQ873/PRO1891	98	10
O95503	CBX6	98	5
P35318	ADM AM	98	45
P36544	CHRNA7 NACHRA7	98	13
P05108	CYP11A1 CYP11A	98	6
O95376	ARIH2 ARI2 TRIAD1 HT005	98	22
Q9BVP2	GNL3 E2IG3 NS	98	36
P29376	LTK TYK1	98	6
Q16555	DPYSL2 CRMP2 ULIP2	98	28
P23297	S100A1 S100A	98	149
P10600	TGFB3	98	6
P24001	IL32 NK4 TAIF	98	30
P01229	LHB	98	163
P61968	LMO4	98	49
P55036	PSMD4 MCB1	98	43
Q16649	NFIL3 E4BP4 IL3BP1	98	29
Q96PU8	QKI HKQ	98	81
O43566	RGS14	98	30
Q16644	MAPKAPK3	98	59
Q01970	PLCB3	98	19
Q8TE12	LMX1A	98	7
P13591	NCAM1 NCAM	98	507
P51812	RPS6KA3 ISPK1 MAPKAPK1B RSK2	98	73
P27930	IL1R2 IL1RB	98	81
O00470	MEIS1	98	18
P02533	KRT14	98	174
P85037	FOXK1 MNF	98	3
Q9BZB8	CPEB1 CPEB	98	4
P42330	AKR1C3 DDH1 HSD17B5 KIAA0119 PGFS	98	15
Q99607	ELF4 ELFR MEF	98	24
Q9UKV5	AMFR RNF45	98	16
P02671	FGA	98	159
P03950	ANG RNASE5	98	59
O60671	RAD1 REC1	98	88
O15269	SPTLC1 LCB1	98	15
[truncated: 14,263 more rows]
